# Supplementary material
Source: publisher figshare collection journal article supplement (https://karger.figshare.com/articles/dataset/_/6085949)
Supplement: Supplementary file 2 [file 1]

Supplementary Table 1. List of identified proteins.

| <b>Nr Prot.</b> | <b>Spot Nr</b> | <b>Spot Nr</b> | <b>Access Nr</b>         | <b>Protein name</b>                                               | <b>GI</b> | <b>Prob.</b> | <b>Z-value</b> | <b>Sequence coverage (%)</b> | <b>Mr theor.</b> | <b>Mr exp.</b> | <b>pI theor.</b> | <b>pI exp.</b> |
|-----------------|----------------|----------------|--------------------------|-------------------------------------------------------------------|-----------|--------------|----------------|------------------------------|------------------|----------------|------------------|----------------|
| <b>1</b>        | 58             | 3202           | CAH 56226.1              | Hypothetical protein                                              | 52545830  | 1.0          | 1.1            | 31                           | 26               | 26             | 10.2             | 10.2           |
| <b>2</b>        | 59             | 3223           | Q96MK3.3                 | FA20A Human                                                       | 38258949  | 1.0          | 0.93           | 21                           | 62               | 62             | 9                | 9              |
| <b>3</b>        | 60             | 1449           | BAC05002.1               | Unnamed protein                                                   | 21757045  | 1.0          | 2.32           | 33                           | 52               | 50             | 5                | 4.5            |
| <b>4</b>        | 61             | 1496           | 1HK2                     | chainA, human serum albumin mutant R218h complexed with thyroxine | 31615330  | 1.0          | 1.7            | 19                           | 68               | 70             | 5.7              | 6              |
| <b>5</b>        | 62             | 1495           | CAD62296.1               | Unnamed protein product (H.S.)                                    | 28193108  | 1.0          | 1.03           | 27                           | 49.6             | 50             | 5.3              | 5              |
| <b>6</b>        | 63             | 1485           | AAF13605.1<br>AF188611_1 | BiP protein                                                       | 6470150   | 1.0          | 1.43           | 21                           | 70               | 40             | 5                | 5              |
| <b>7</b>        | 64             | 1962           | AAH21622.1               | Phosphoinositide-3-kinase, reg. Subunit 3 (gamma) (H.S.)          | 20987209  | 9.9-001      | 1.0            | 32                           | 54               | 40             | 5.8              | 6              |
| <b>8</b>        | 65             | 1915           | BAC04674.1               | Unnamed protein product                                           | 21755396  | 1.0          | 0.88           | 24                           | 41               | 50             | 10               | 7              |
| <b>9</b>        | 66             | 1913           | AAD16737.1               | Immunoglobulin lambda chain Vr                                    | 4324196   | 9.5-001      | 0.53           | 52                           | 40               | 10             |                  | 6              |
| <b>10</b>       | 67             | 1891           | CAB66500.2               | Hypothetical protein                                              | 50949346  | 9.6-001      | 0.63           | 16                           | 96               | 50             | 5.9              | 5.7            |
| <b>11</b>       | 68             | 1855           | AAH34965.1               | EF-hand domain family member A1                                   | 23241309  | 1.0          | 0.94           | 37                           | 50               | 50             | 9.3              | 6              |
| <b>12</b>       | 69             | 1850           | CAI14893.1               | Tubulin beta                                                      | 57209813  | 1.0          | 1.66           | 33                           | 48               | 40             | 4.7              | 5              |
| <b>13</b>       | 70             | 1849           | CAI41893.1               | Tubulin beta                                                      | 57209813  | 1.0          | 1.42           | 33                           | 48               | 37             | 4.7              | 5              |
| <b>14</b>       | 71             | 1838           | AAH35198.1               | Pyruvate kinase,muscle                                            | 31416989  | 1.0          | 1.07           | 28                           | 58               | 50             | 8.4              | 7              |
| <b>15</b>       | 72             | 1825           | AAH50449.1               | ARFGEF2 protein (H.S.)                                            | 29972202  | 1.0          | 1.01           | 18                           | 94               | 70             | 5.7              | 5              |
| <b>16</b>       | 73             | 1792           | CAH18203.1               | Hypothetical protein                                              | 51476426  | 9.6-001      | 0.56           | 20                           | 78               | 37             | 10               | 7              |
| <b>17</b>       | 74             | 1776           | CAG32997.1               | PGK1 (H.S.)                                                       | 48145549  | 1.0          | 1.61           | 39                           | 45               | 37             | 8.6              | 8              |
| <b>18</b>       | 75             | 1757           | AAG48940.1/              | Polybromo-1 (H-.S.)                                               | 23        | 1.0          | 0.93           | 23                           | 99               | 37             | 8.5              | 8              |

Supplementary Table 1. List of identified proteins.

|           |    |      |                           |                                                               |          |         |      |    |     |    |     |   |
|-----------|----|------|---------------------------|---------------------------------------------------------------|----------|---------|------|----|-----|----|-----|---|
|           |    |      | AF225871_1                |                                                               |          |         |      |    |     |    |     |   |
| <b>19</b> | 76 | 1726 | AAA63194.1                | Heat shock protein 90                                         | 703087   | 1.0     | 1.04 | 25 | 85  | 50 | 4.9 | 5 |
| <b>20</b> | 77 | 1701 | AAF21780.1                | Zinc finger protein 74 isoform IV (H.S.)                      | 6650236  | 1.0     | 1.17 | 24 | 65  | 50 | 10  | 5 |
| <b>21</b> | 78 | 1692 | NP_848698.1               | WD repeat and FYVE domain containing 3 isoform 2 (H.S.)       | 31317268 | 9.3-001 | 0.87 | 23 | 90  | 70 | 7.4 | 7 |
| <b>22</b> | 79 | 1662 | AAF99374.1/<br>AF233620_1 | Thromboxane synthase                                          | 9800406  | 9.5-001 | 0.65 | 23 | 61  | 40 | 7.9 | 6 |
| <b>23</b> | 80 | 1655 | BAD18690.1                | Unnamed protein product                                       | 47077616 | 1.0     | 0.9  | 33 | 54  | 50 | 7.3 | 7 |
| <b>24</b> | 81 | 1636 | BAD10848.1                | Lymphoid specific helicase variant 5                          | 42407263 | 9.8-001 | 0.88 | 32 | 40  | 70 | 9.1 | 7 |
| <b>25</b> | 82 | 1634 | BAA75063.1                | Apg-1                                                         | 4579911  | 9.0-001 | 0.45 | 21 | 95  | 70 | 5.6 | 7 |
| <b>26</b> | 83 | 1626 | BAA34483.2                | KIAA0763 protein                                              | 40788355 | 1.0     | 1.09 | 20 | 95  | 70 | 7.4 | 7 |
| <b>27</b> | 84 | 1624 | NP_056969.2               | Pre-mRNA cleavage complex II protein complex II protein Pcf11 | 33620745 | 1.0     | 1.0  | 13 | 173 | 70 | 8.9 | 7 |
| <b>28</b> | 85 | 1610 | AAH17450.1                | Unknown protein H.S.                                          | 16924319 | 9.7-001 | 0.59 | 33 | 40  | 60 | 5.8 | 5 |
| <b>29</b> | 86 | 1599 | AAQ89086.1                | ERGL (H.S.)                                                   | 37182569 | 1.0     | 1.22 | 26 | 56  | 40 | 9.2 | 7 |
| <b>30</b> | 87 | 1595 | BAA77831.1                | Neurochondrin -2 (H.S)                                        | 4887650  | 1.0     | 0.9  | 25 | 78  | 75 | 5.3 | 6 |
| <b>31</b> | 88 | 1577 | NP_068781                 | Active breakpoint cluster region related protein isoform A    | 38679957 | 9.3-001 | 0.54 | 16 | 97  | 75 | 6.1 | 6 |
| <b>32</b> | 89 | 1570 | AAO39000.1                | HOMER1F                                                       | 28396185 | 1.0     | 0.95 | 43 | 21  | 70 | 5   | 7 |
| <b>33</b> | 90 | 1569 | AAS01769.1                | Monoclonal IgM antibody , heavy chain (H.S)                   | 41388180 | 1.0     | 0.84 | 20 | 65  | 60 | 6.6 | 6 |
| <b>34</b> | 92 | 1558 | AAH31684.1                | CCDC33 protein                                                | 21594935 | 1.0     | 1.21 | 25 | 78  | 66 | 7.4 | 7 |
| <b>35</b> | 94 | 1544 | BAC04414.1                | Unnamed protein                                               | 21753875 | 1.0     | 1.01 | 22 | 60  | 40 | 8.5 | 6 |
| <b>36</b> | 96 | 1533 | AAH41789.1                | ALB protein                                                   | 27692693 | 1.0     | 1.69 | 24 | 49  | 70 | 6   | 5 |

Supplementary Table 1. List of identified proteins.

|           |     |       |             |                                                                                  |          |         |      |    |      |    |      |   |
|-----------|-----|-------|-------------|----------------------------------------------------------------------------------|----------|---------|------|----|------|----|------|---|
| <b>37</b> | 97  | 1532  | AAH12854.1  | ACTB protein                                                                     | 15277503 | 1.0     | 1.35 | 30 | 41   | 75 | 5.6  | 5 |
| <b>38</b> | 98  | 1518  | AAH07276.2  | HSPA8 protein                                                                    | 48257068 | 1.0     | 1.4  | 23 | 65   | 50 | 5.4  | 5 |
| <b>39</b> | 99  | 1510  | NP_003650.1 | Alkyldihydroxyacetone phosphate syntase precursor                                | 4501993  | 9.9-001 | 0.78 | 25 | 74   | 75 | 7    | 7 |
| <b>40</b> | 100 | 1509  | CAA36298.1  | ITF-2 DNA binding protein                                                        | 1184243  | 9.9-001 | 0.76 | 17 | 66   | 70 | 6.5  | 6 |
| <b>41</b> | 101 | 1500  | AAH41789.1  | ALB protein                                                                      | 27692693 | 1.0     | 1.65 | 30 | 48.6 | 70 | 6    | 6 |
| <b>42</b> | 102 | 1444  | NP_055744.2 | FAST kinase domain 2                                                             | 45267832 | 1.0     | 1.21 | 31 | 84   |    | 8.8  |   |
| <b>43</b> | A01 | 1410  | P02675.2    | FIBB_human                                                                       | 399492   | 1.0     | 1.64 | 30 | 57   | 80 | 9.0  | 7 |
| <b>44</b> | A02 | 1606  | AAC39872.1  | Synaptic glycoprotein SC2 spliced variant (H.S)                                  | 3329386  | 9.0-001 | 0.48 | 17 | 36   | 40 | 9.8  | 7 |
| <b>45</b> | A03 | 1636  | NP_001419.1 | Enolase 1 (HS)                                                                   | 4503571  | 1.0     | 0.95 | 37 | 47   | 60 | 7.0  | 7 |
| <b>46</b> | A04 | 1665  | BAB71275.1  | Unnamed protein product (HS)                                                     | 16552261 | 1.0     | 0.95 | 23 | 47   | 40 | 5.0  | 7 |
| <b>47</b> | A05 | 16777 | BAC11295.1  | Unnamed protein product (HS)                                                     | 22760684 |         |      |    |      | 40 |      | 7 |
| <b>48</b> | A06 | 1742  | AAH22455.1  | Resistance to inhibitors of cholinesterase 3 homolog (C. elegans) [Homo sapiens] | 18490667 | 8,7-001 | 0.46 | 32 | 41   | 40 | 5.1  | 7 |
| <b>49</b> | A07 | 1753  | BAB14554.1  | Unnamed protein product (HS)                                                     | 10435300 | 1.0     | 0.85 | 29 | 32   | 37 | 4.7  | 4 |
| <b>50</b> | A08 | 1765  | AAH65706.1  | C12orf51 protein [Homo sapiens]                                                  | 41350956 | 1.0     | 0.97 | 26 | 64   | 40 | 6.2  | 7 |
| <b>51</b> | A09 | 1774  | BAC04674.1  | unnamed protein product [Homo sapiens]                                           | 21755396 | 8.7-001 | 0.49 | 21 | 41   | 60 | 10   | 7 |
| <b>52</b> | A10 | 1803  | NP_055130.1 | kelch domain containing 2 [Homo sapiens]                                         | 7657301  | 1.0     | 0.84 | 29 | 46   | 40 | 6.1  | 7 |
| <b>53</b> | A11 | 1808  | CAH18407.1  | hypothetical protein [Homo sapiens]                                              | 51476882 | 7.2-001 | 0.34 | 22 | 60   | 40 | 10.4 | 7 |
| <b>54</b> | B01 | 1829  | CAD35759.1  | polyserase-IB protein                                                            | 33341912 | 9.5-    | 0.54 | 14 | 93   | 37 | 9    | 7 |

Supplementary Table 1. List of identified proteins.

|           |     |      |                          |                                                             |          |         |      |    |     |    |     |     |
|-----------|-----|------|--------------------------|-------------------------------------------------------------|----------|---------|------|----|-----|----|-----|-----|
|           |     |      |                          | [Homo sapiens]                                              |          | 001     |      |    |     |    |     |     |
| <b>55</b> | B02 | 1839 | CAA39849.1               | pyruvate kinase [Homo sapiens]                              | 35505    | 1.0     | 2.39 | 38 | 58  | 37 | 7.8 | 6   |
| <b>56</b> | B03 | 1857 | NP_250637.1              | ribose transport protein RbsA [Pseudomonas aeruginosa PAO1] | 15597143 | 9.6-001 | 0.6  | 18 | 56  | 60 | 6.1 | 6   |
| <b>57</b> | B04 | 1868 | AAV38265.1               | cyclin B2 [Homo sapiens]                                    | 54695786 | 9.4-001 | 0.5  | 27 | 45  | 50 | 9.1 | 6   |
| <b>58</b> | B05 | 1872 | BAA02632.1               | alanine:glyoxylate aminotransferase                         | 219433   | 9.9-001 | 0.79 | 28 | 43  | 37 | 9   | 6   |
| <b>59</b> | B06 | 1906 | BAC87240.1               | unnamed protein product                                     | 34535207 | 1.0     | 0.9  | 16 | 77  | 37 | 9   | 6   |
| <b>60</b> | B07 | 1933 | CAH56226.1               | hypothetical protein [Homo sapiens]                         | 52545830 | 1.0     | 0.89 | 33 | 26  | 50 | 10  | 7   |
| <b>61</b> | B08 | 1989 | AAA52426.1               | alpha-fibrinogen precursor [Homo sapiens]                   | 182424   | 1.0     | 0.89 | 19 | 70  | 50 | 8.6 | 7   |
| <b>62</b> | B09 | 2002 | BAA02632.1               | alanine:glyoxylate aminotransferase [Homo sapiens]          | 219433   | 1.0     | 0.96 | 24 | 43  | 30 | 9.0 | 6.0 |
| <b>63</b> | B10 | 2038 | CAH72599.1               | aconitase 1, soluble [Homo sapiens]                         | 55663279 | 1.0     | 0.91 | 26 | 49  | 37 | 5.8 | 5   |
| <b>64</b> | B11 | 2089 | AAL29182.1<br>AF148135_1 | ZNF317-1 protein [Homo sapiens]                             | 16797812 | 9.4-001 | 0.54 | 21 | 66  | 30 | 9.9 | 6   |
| <b>65</b> | C01 | 2139 | NP_006254.1              | proteasome activator subunit 1 isoform 1 [Homo sapiens]     | 5453990  | 1.0     | 2.25 | 49 | 29  | 30 | 5.8 | 6   |
| <b>66</b> | C02 | 2176 | EAL24463.1               | 5'-nucleotidase, cytosolic III [Homo sapiens]               | 51105879 | 1.0     | 0.97 | 27 | 32  | 30 | 5.5 | 5   |
| <b>67</b> | C03 | 2216 | AAB21839.1               | albumin [human, Peptide Partial Mutant, 25 aa]              | 247527   | 1.0     | 1.08 | 96 | 3.1 | 25 | 9.7 | 6   |
| <b>68</b> | C04 | 2249 | NP_116020.1              | hepatoma-derived growth factor-related protein 2            | 14249158 | 9.6-001 | 0.69 | 26 | 74  | 30 | 7.1 | 5   |

Supplementary Table 1. List of identified proteins.

|           |     |      |             |                                                                                            |          |         |      |    |      |    |     |     |
|-----------|-----|------|-------------|--------------------------------------------------------------------------------------------|----------|---------|------|----|------|----|-----|-----|
|           |     |      |             | isoform 2 [Homo sapiens]                                                                   |          |         |      |    |      |    |     |     |
| <b>69</b> | C05 | 2346 | AAA36192.1  | M4 protein [Homo sapiens]                                                                  | 187281   | 9.9-001 | 0.71 | 20 | 74   | 30 | 9.3 | 5   |
| <b>70</b> | C06 | 2376 | NP_037462.1 | nucleoside diphosphate kinase 7 isoform a [Homo sapiens]                                   | 7019465  | 1.0     | 0.9  | 27 | 43   | 30 | 6.0 | 7   |
| <b>71</b> | C07 | 2385 | CAA12706.1  | Immunoglobulin heavy chain variable region                                                 | 2951629  | 9.6-001 | 0.67 | 72 | 8.62 | 30 | 9   | 9   |
| <b>72</b> | C08 | 2389 | NP_001697.2 | unnamed protein product [Homo sapiens]                                                     | 21040324 | 9.8-001 | 0.69 | 25 | 80   | 30 | 9   | 9   |
| <b>73</b> | C09 | 2403 | AAA64922.1  | Albumin like                                                                               | 763431   | 9.8-001 | 0.62 | 31 | 53   | 25 | 5.7 | 4   |
| <b>74</b> | C10 | 2445 | NP_060620.2 | Ring finger protein 220                                                                    | 46397375 | 9.9-001 | 0.76 | 25 | 63   | 25 | 5.7 | 5   |
| <b>75</b> | C11 | 2463 | 1M7         | Chain E, Crystal Structure Of Human Pnp At 2.3a Resolution                                 | 37926571 | 1.0     | 0.94 | 45 | 32   | 20 | 6.5 | 6.7 |
| <b>76</b> | D02 | 2473 | NP_055130.1 | kelch domain containing 2 [Homo sapiens]                                                   | 7657301  | 1.0     | 0.92 | 23 | 46   | 25 | 6   | 5.5 |
| <b>77</b> | D03 | 2519 | NP_060387.2 | Serine/threonine-protein phosphatase 2A regulatory subunit B" gamma subunit [Homo sapiens] | 31542242 | 1.0     | 0.92 | 26 | 51   | 20 | 5.1 | 5.5 |
| <b>78</b> | D04 | 2527 | BAA91308.1  | unnamed protein product [Homo sapiens]                                                     | 7020883  | 1.0     | 0.99 | 17 | 53   | 25 | 5.1 | 6   |
| <b>79</b> | D05 | 2543 | NP_071920.1 | hedgehog-interacting protein precursor [Homo sapiens]                                      | 20143973 | 1.0     | 0.8  | 19 | 80   | 20 | 9   | 6   |
| <b>80</b> | D06 | 2550 | AAC95399.1  | G-rich sequence factor 1                                                                   | 517196   | 9.2-001 | 0.51 | 25 | 48   | 20 | 5.5 | 6   |

Supplementary Table 1. List of identified proteins.

|           |     |      |                       |                                                                        |          |         |      |    |      |    |     |   |
|-----------|-----|------|-----------------------|------------------------------------------------------------------------|----------|---------|------|----|------|----|-----|---|
| <b>81</b> | D07 | 2572 | AAK63198.1 AF273058_1 | CTAGE-2 [Homo sapiens]                                                 | 14486585 | 1.0     | 0.88 | 27 | 86   | 56 | 6   | 7 |
| <b>82</b> | D08 | 2582 | NP_620147.1           | Leo1, Paf1/RNA polymerase II complex component, homolog [Homo sapiens] | 20270337 | 9.1-001 | 0.48 | 15 | 75   | 25 | 4.4 | 4 |
| <b>83</b> | D09 | 2602 | AAQ88750.1            | EQYK340                                                                | 37181893 | 9.2-001 | 0.53 | 16 | 95   | 20 | 8.3 | 6 |
| <b>84</b> | D10 | 2609 | 1SYV                  | Chain A, Hla-B4405 Complexed To The Dominant Self Ligand Eefgraygf     | 56553798 | 9.9-001 | 0.83 | 28 | 32   | 50 | 5.5 | 5 |
| <b>85</b> | D11 | 2647 | CAA52924.1            | keratin 9 [Homo sapiens]                                               | 453155   | 9.9-001 | 0.8  | 19 | 62   | 30 | 5.1 | 7 |
| <b>86</b> | E01 | 2650 | AAF75774.1            | p21WAF1/CIP1 promoter-interacting protein [Homo sapiens]               | 8489835  | 5.7-001 | 0.24 | 16 | 62   | 20 | 5.4 | 6 |
| <b>87</b> | E02 | 2765 | NP_055764.2           | hypothetical protein LOC22889 [Homo sapiens]                           | 55741675 | 1.0     | 0.97 | 21 | 65   | 20 | 9   | 7 |
| <b>88</b> | E03 | 2764 | AAH75044.1            | PSD3 protein [Homo sapiens]                                            | 50960816 | 1.0     | 0.89 | 29 | 60   | 20 | 9   | 6 |
| <b>89</b> | E04 | 2844 | AAH07998.1            | KIAA1602 protein [Homo sapiens]                                        | 14124948 | 9.0-001 | 0.45 | 21 | 69   | 37 | 9.5 | 6 |
| <b>90</b> | E05 | 2875 | NP_690040.1           | sorting nexin 3 isoform b [Homo sapiens]                               | 23111041 | 1.0     | 0.86 | 48 | 14.8 | 37 | 6.8 | 6 |
| <b>91</b> | E06 | 2977 | BAA31670.2            | KIAA0695 protein [Homo sapiens]                                        | 20521131 | 9.2-001 | 0.5  | 23 | 91   | 37 | 8.5 | 6 |

Annotations in the table are as follows: List of spots – indicates the list of 91 proteins identified in this study.

Spot Nr – indicates spot assignment as it was upon analysis of gel images. Accession number, names of proteins, GI numbers, probability of significant identification, Z values and theoretical Mr and pI were assigned upon searches for identified proteins by Profound tool and NCBI nr database. Experimental Mr and pI were assigned to the protein spots in relation to their migration in 2D gels.
