# Supplementary material
Source: publisher figshare collection journal article supplement (https://karger.figshare.com/articles/dataset/_/6085949)

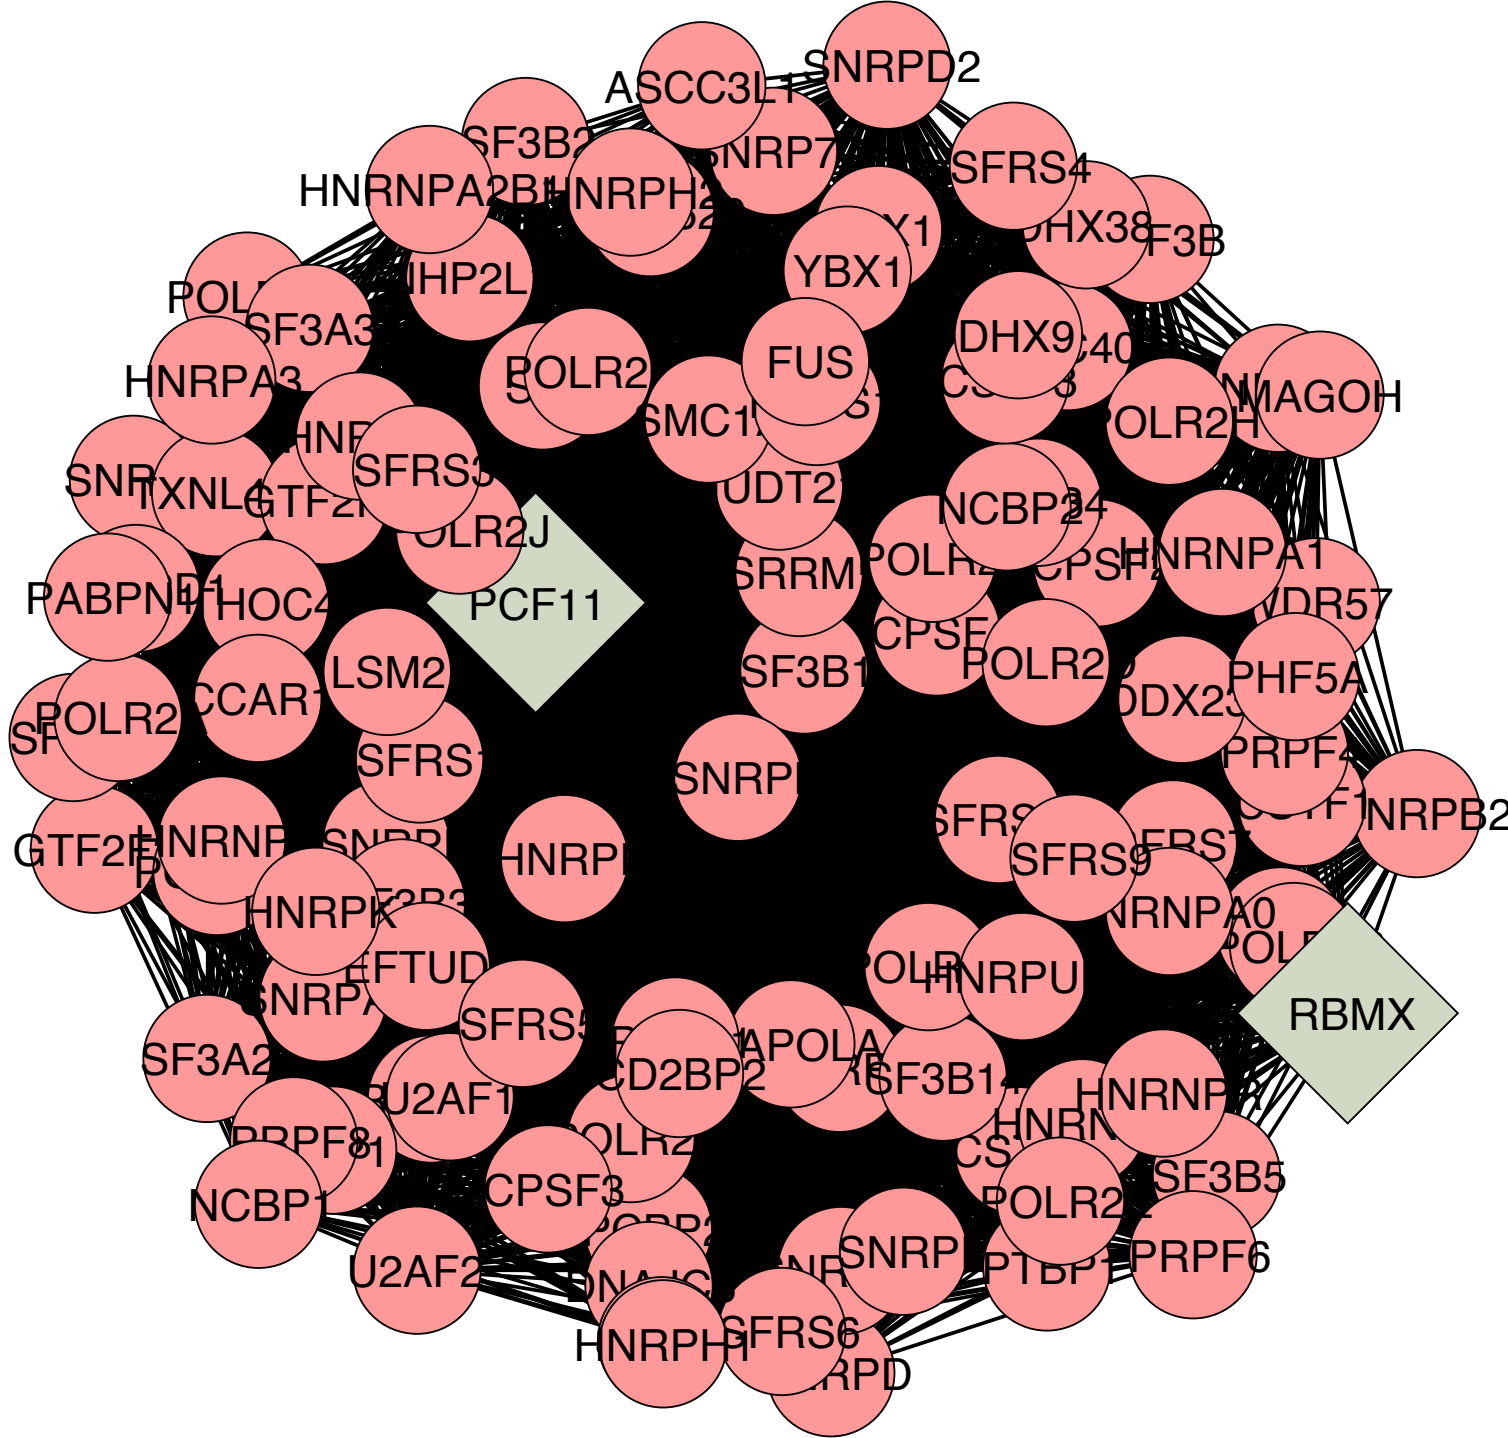

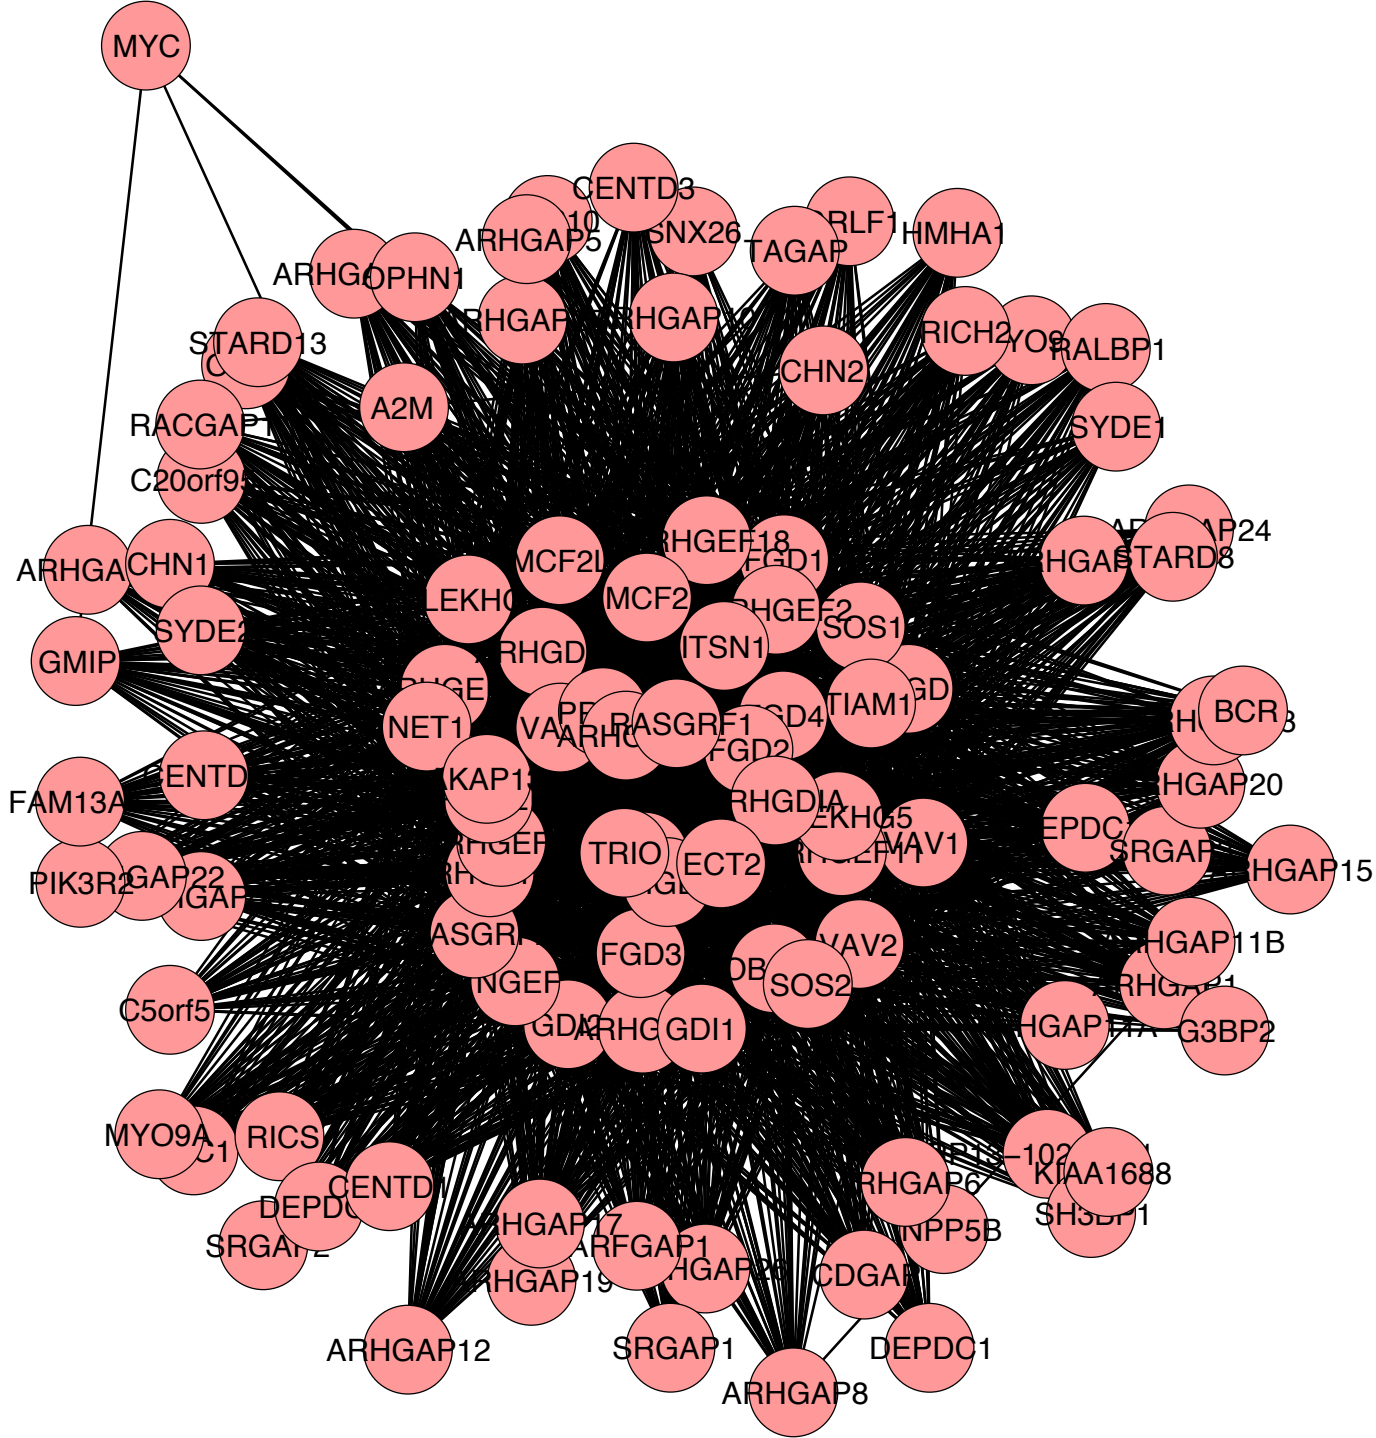

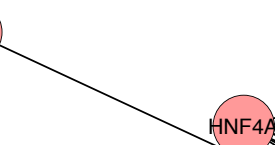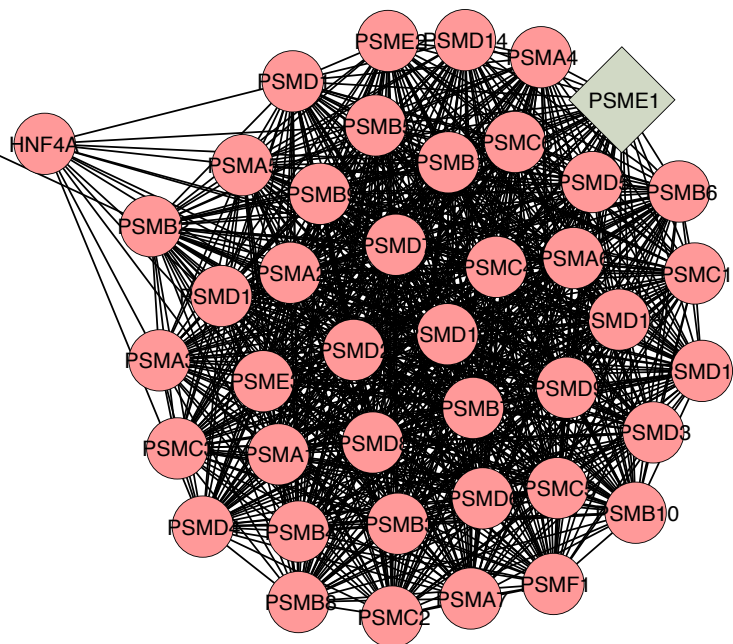

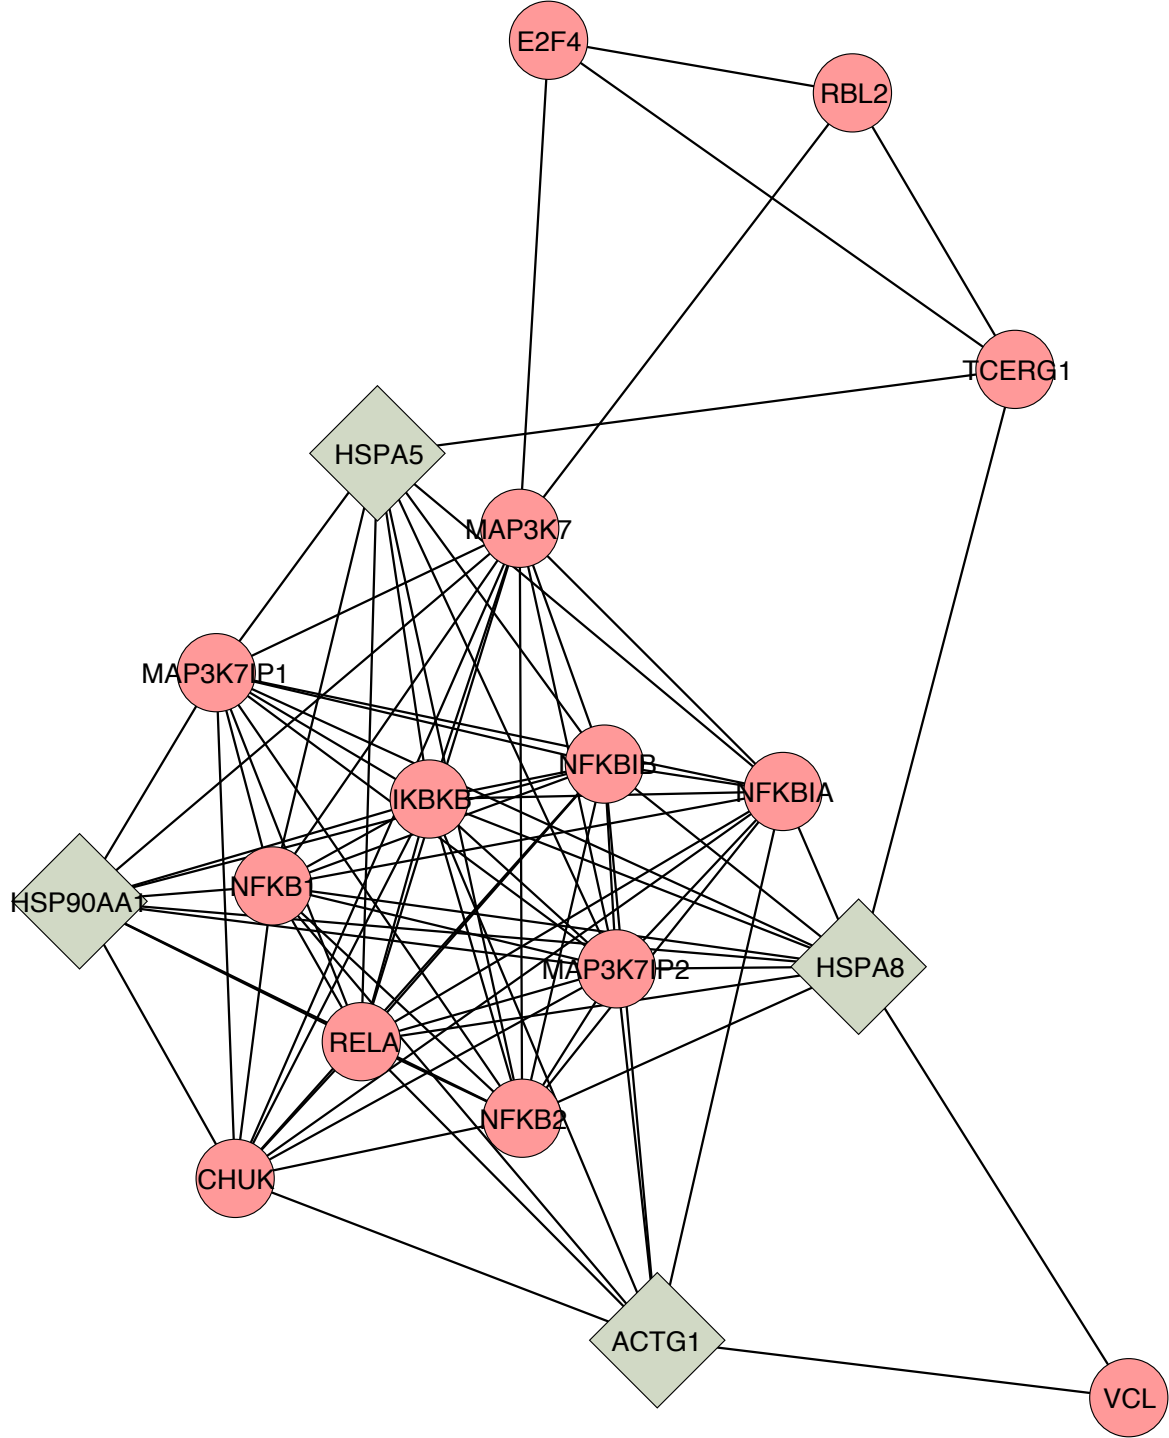

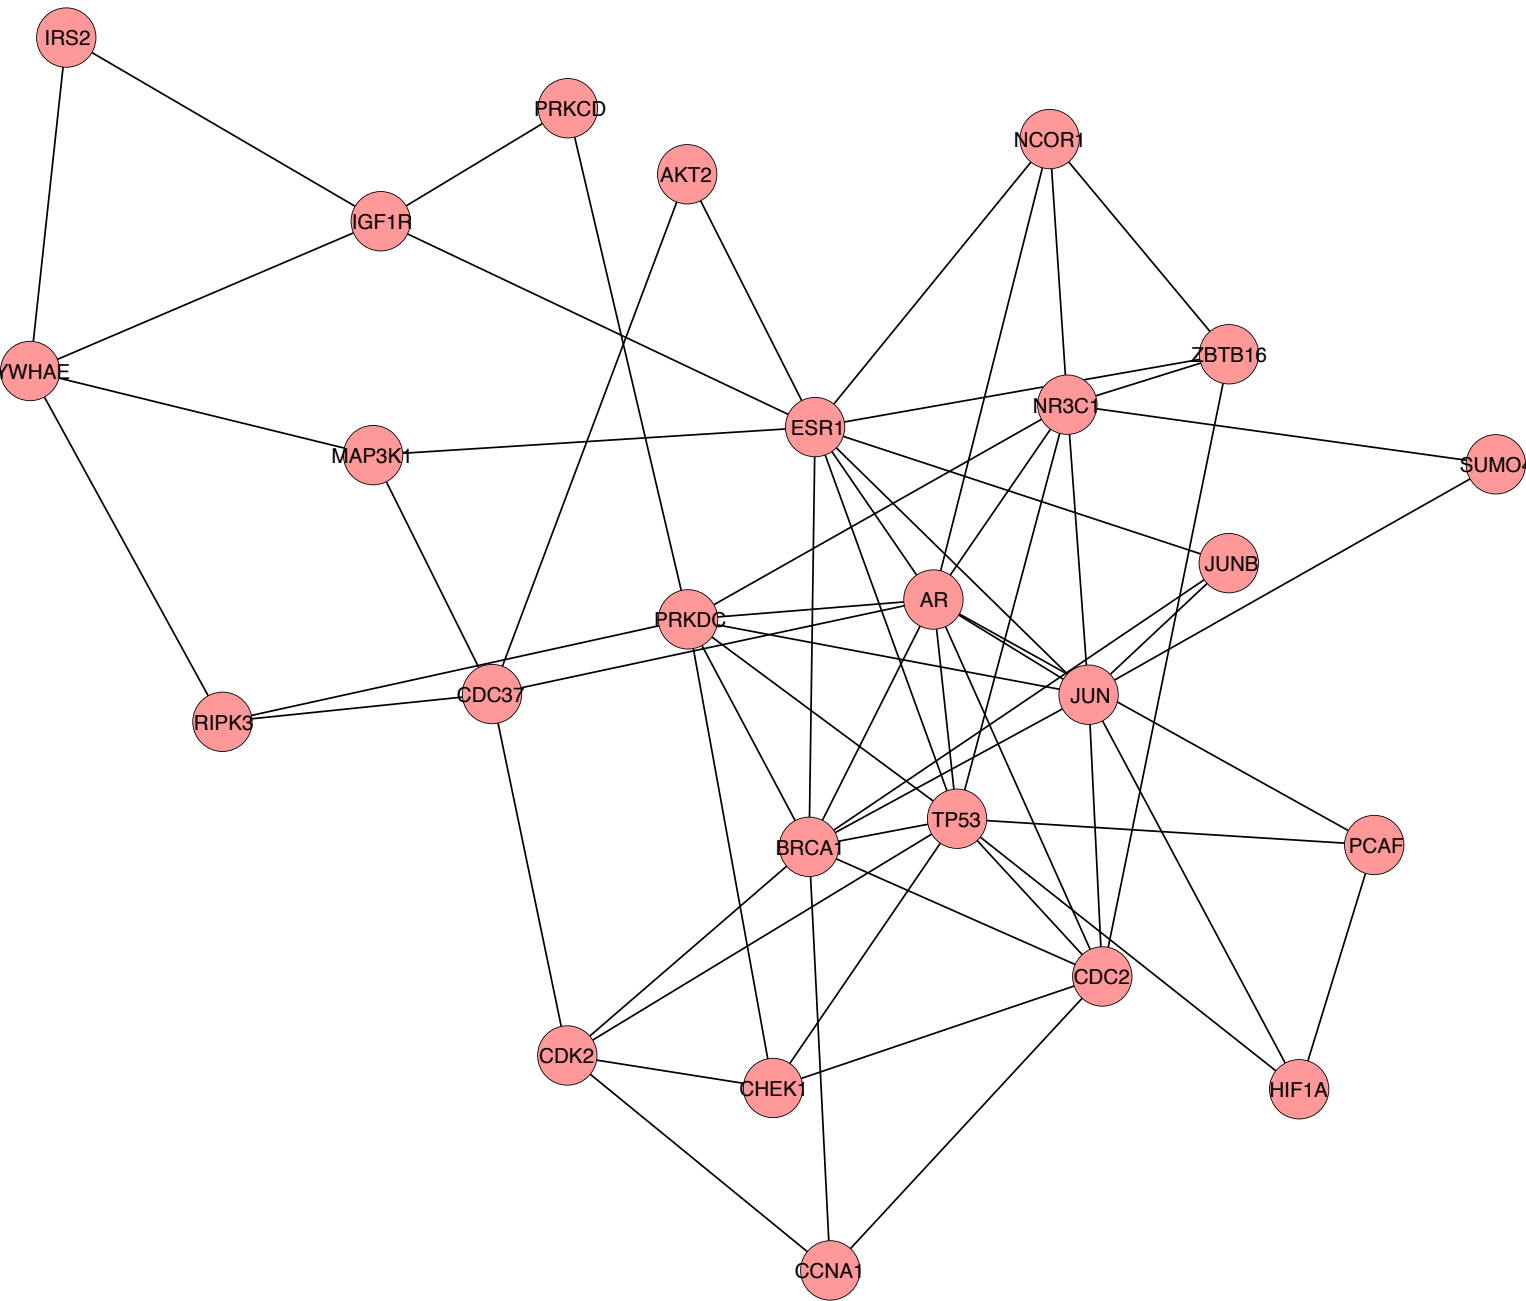

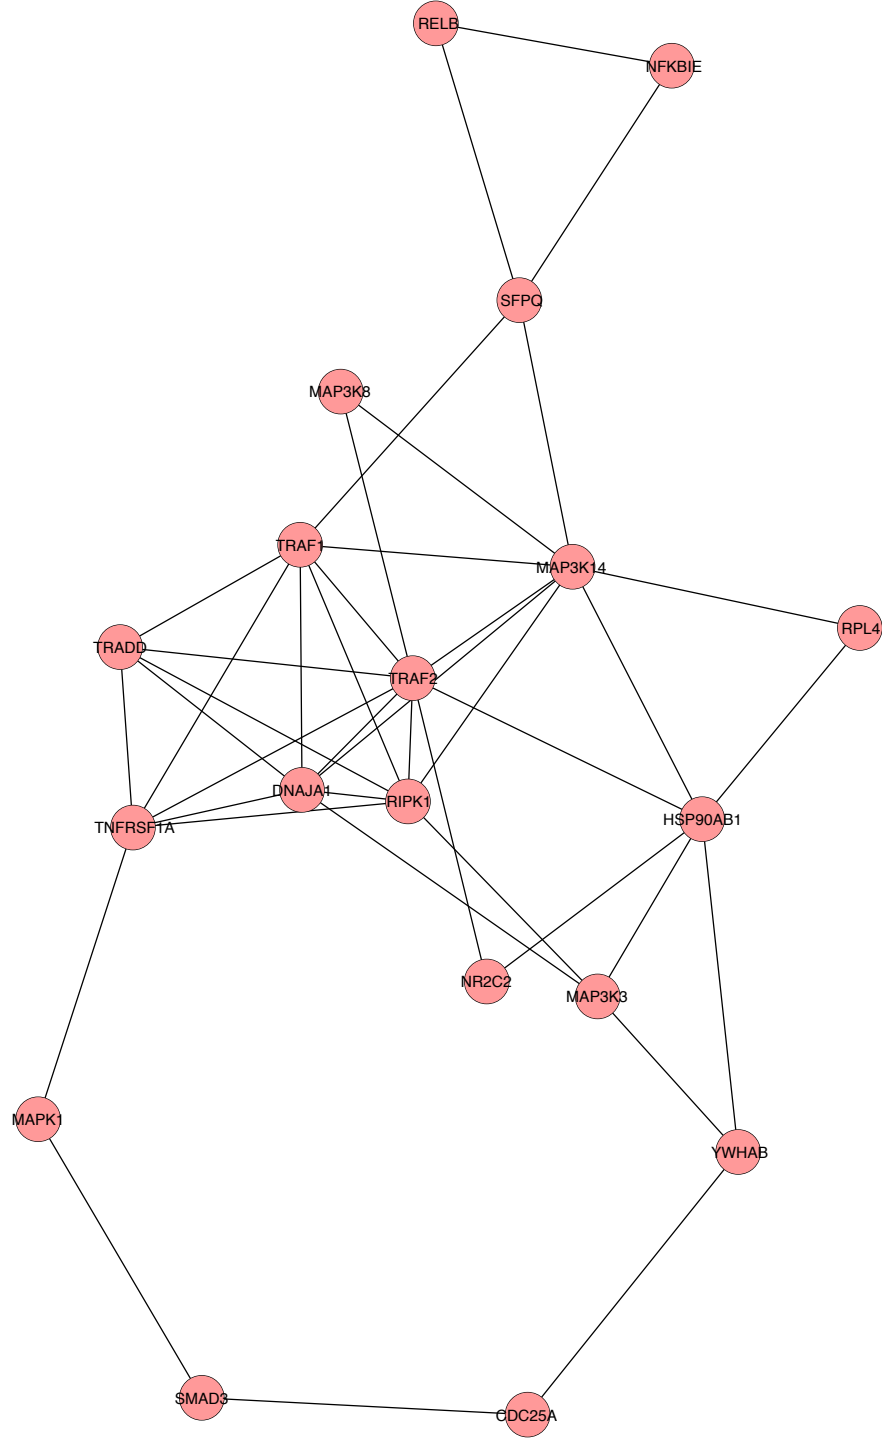

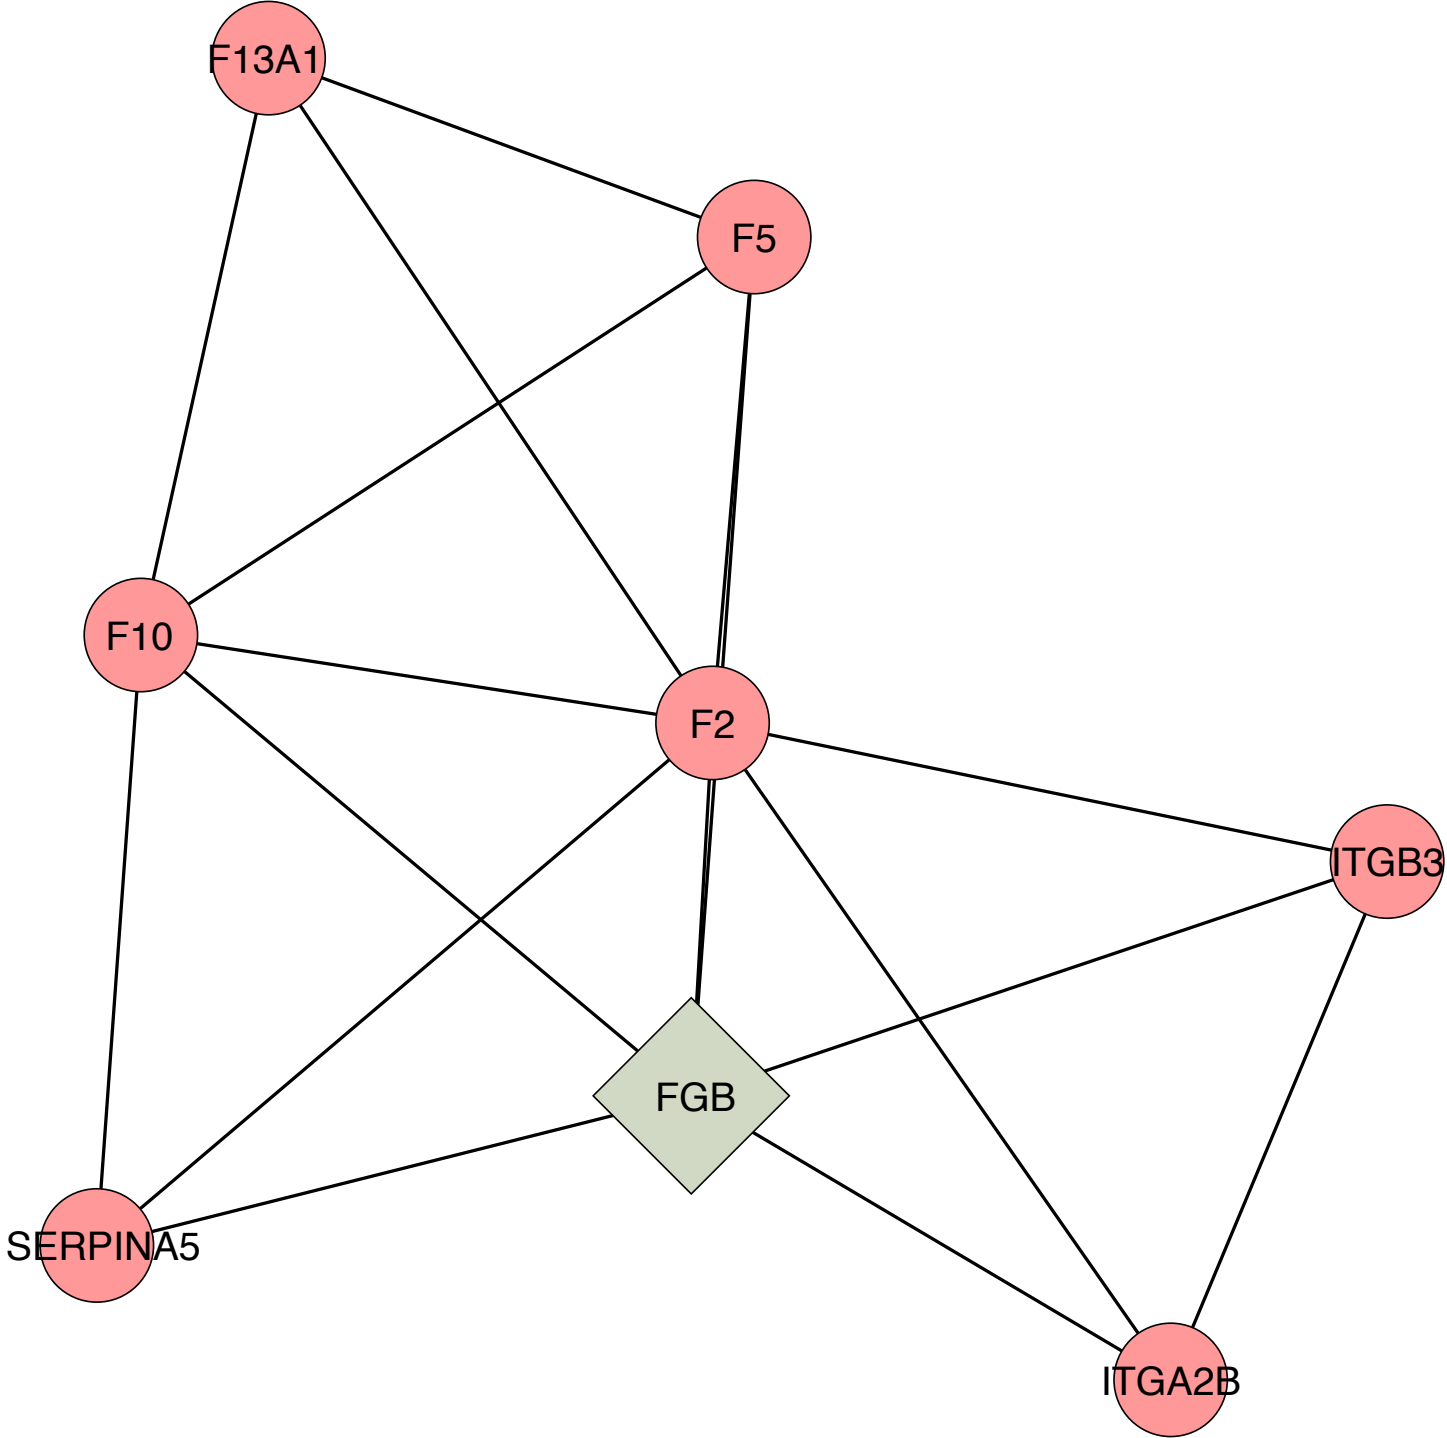

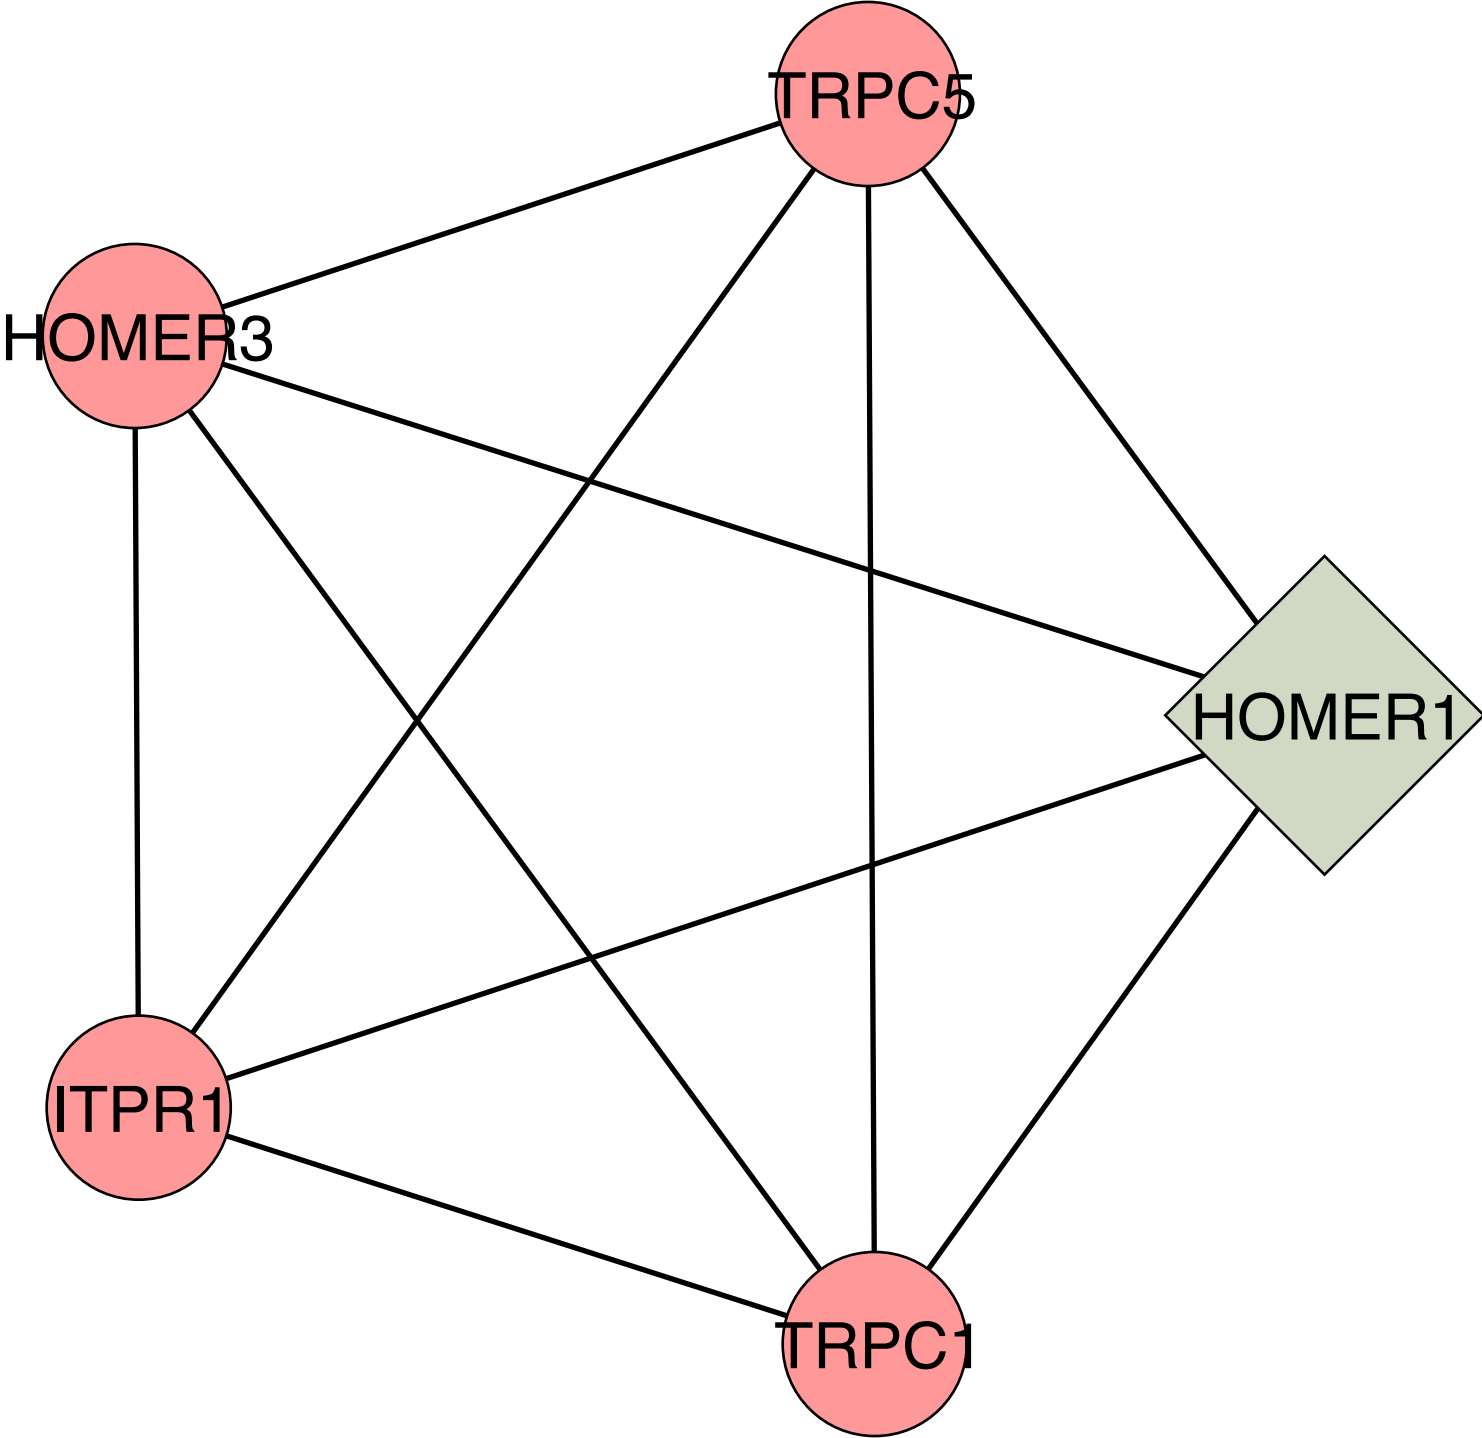

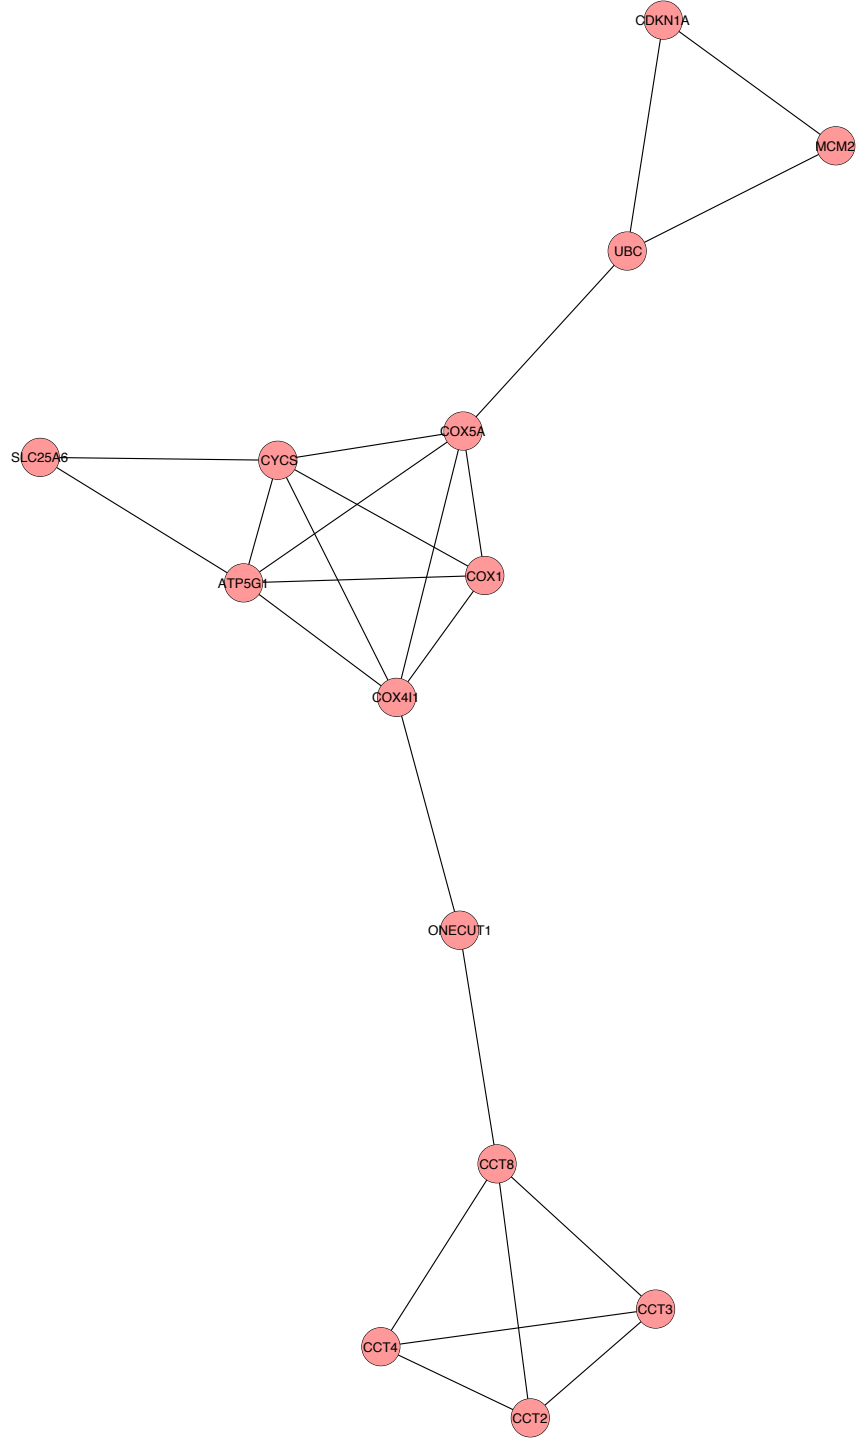

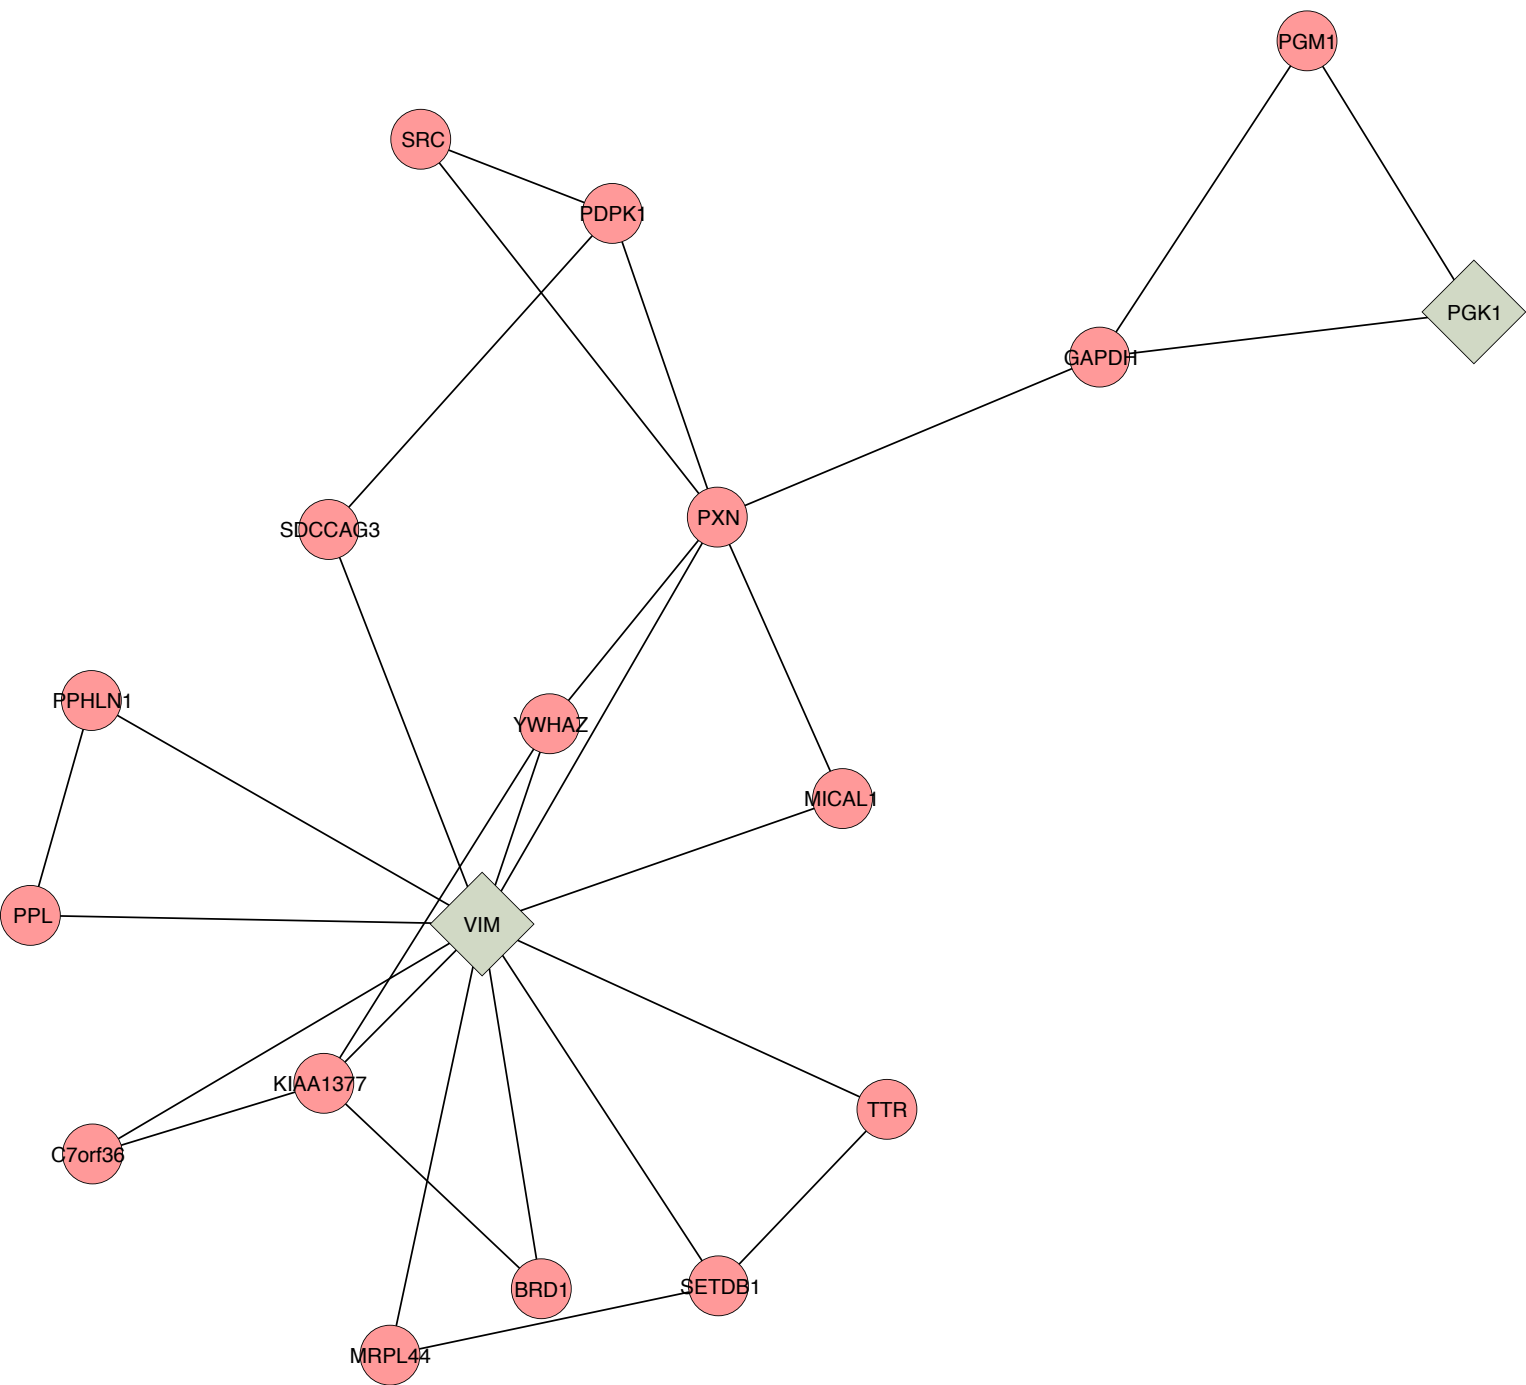

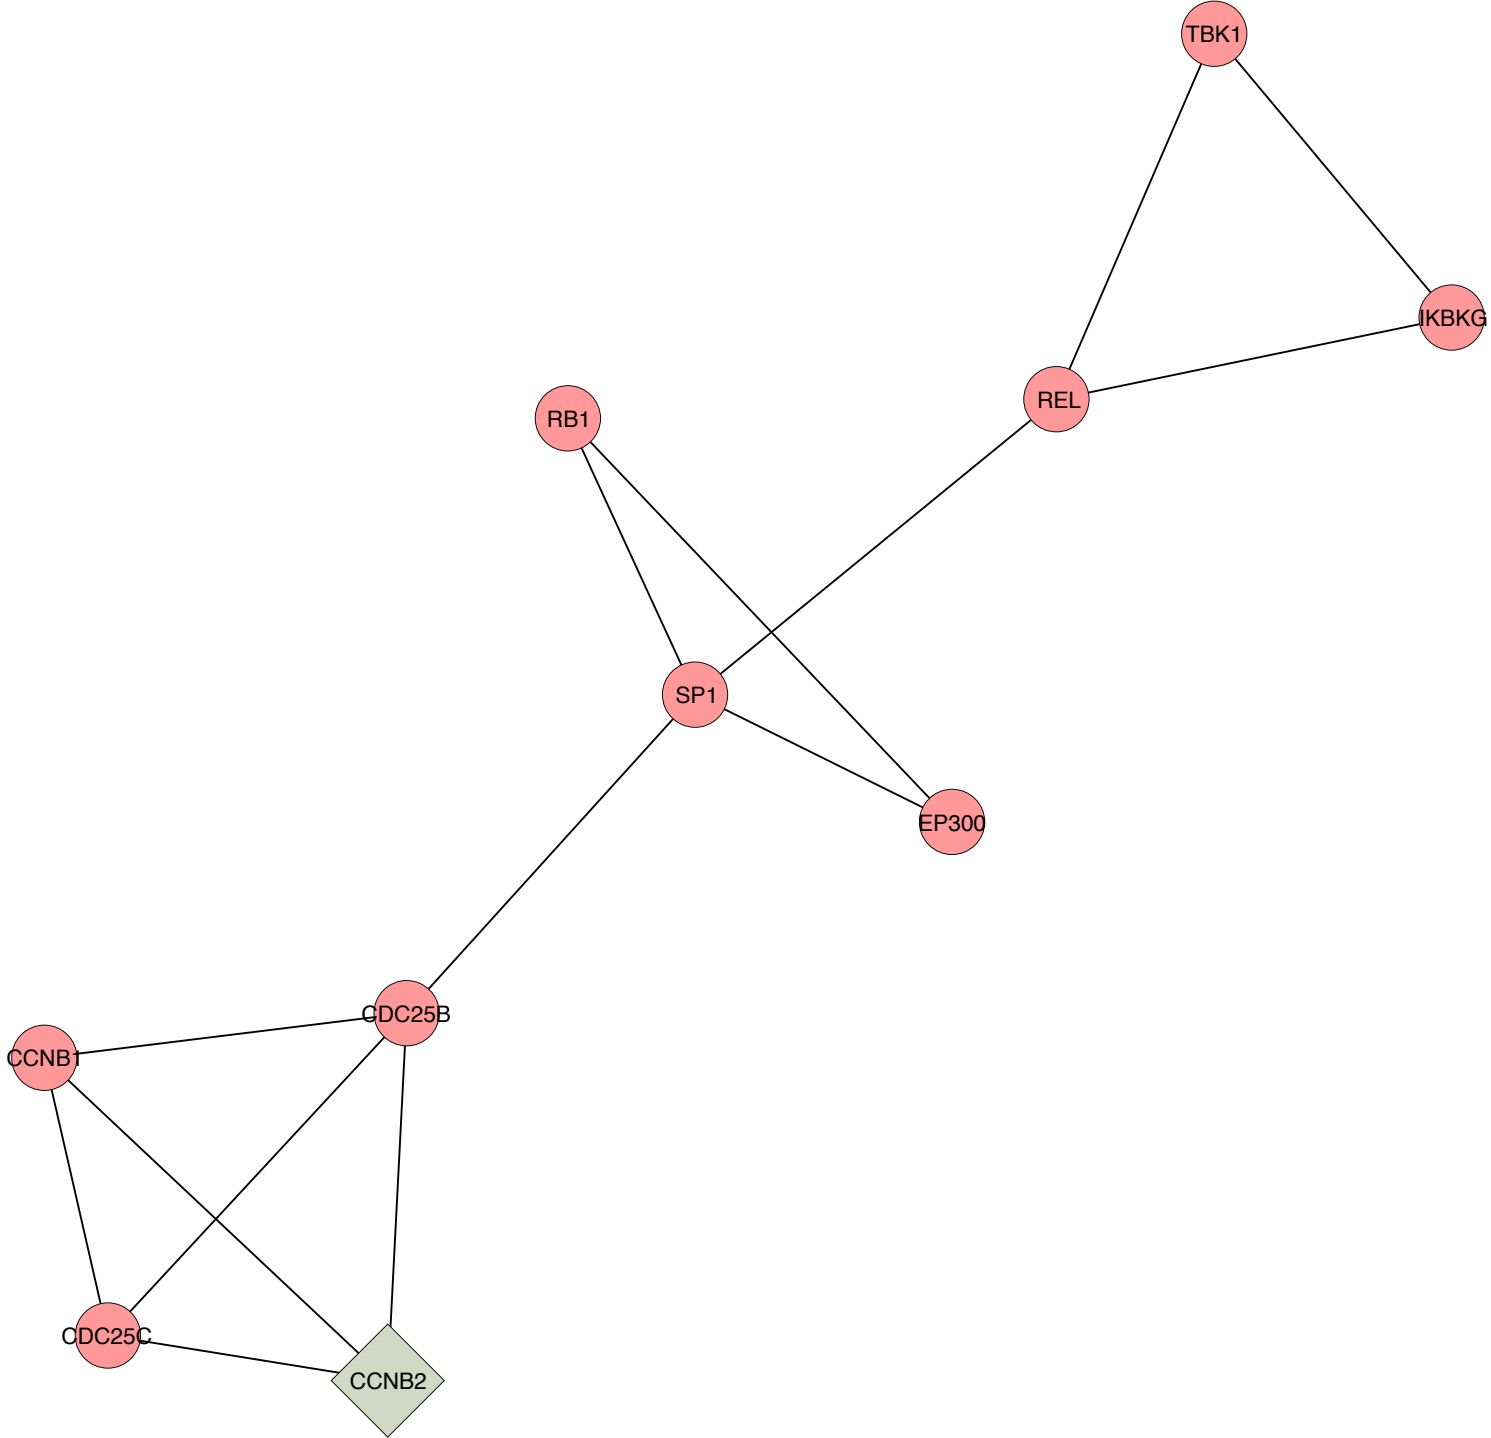

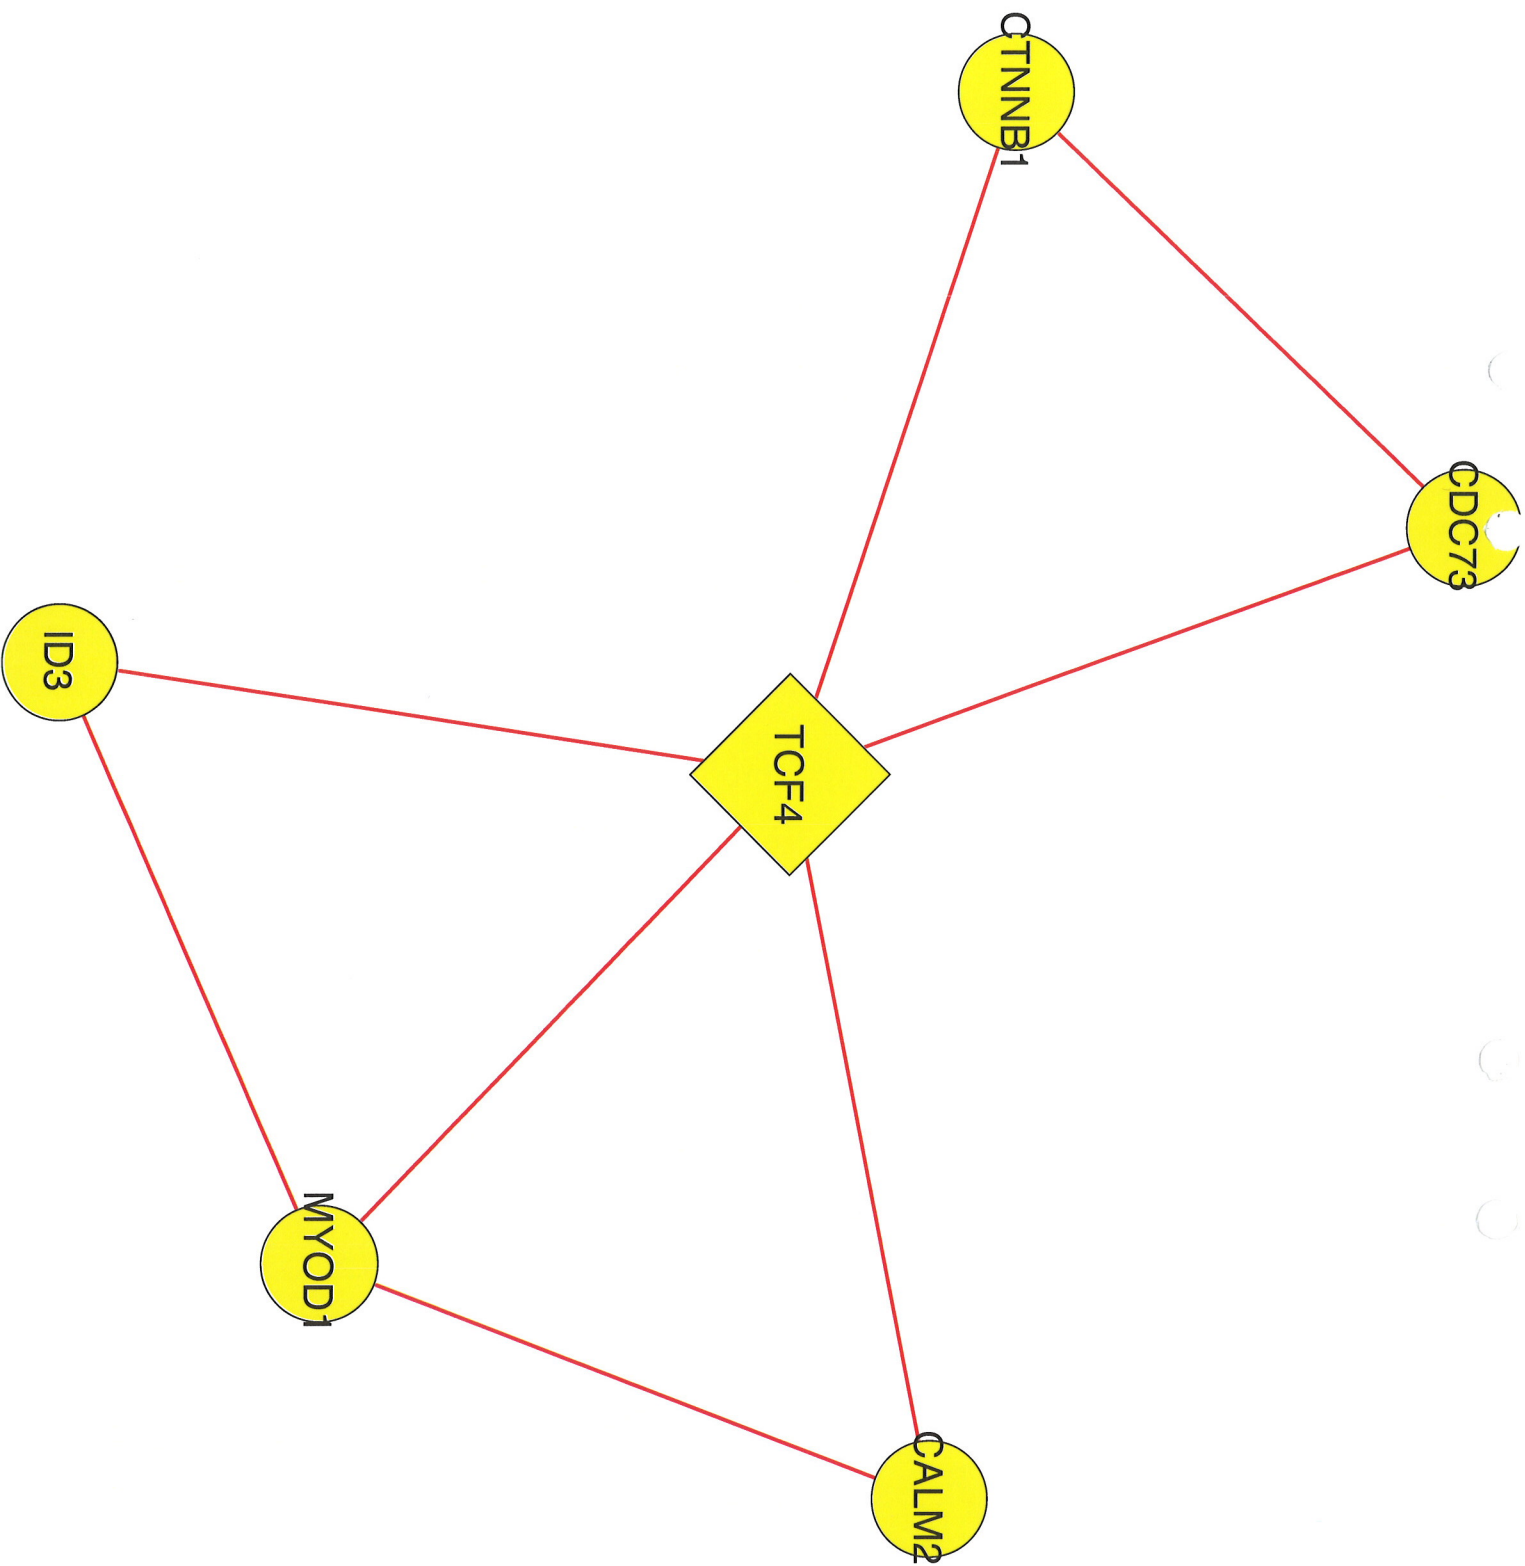

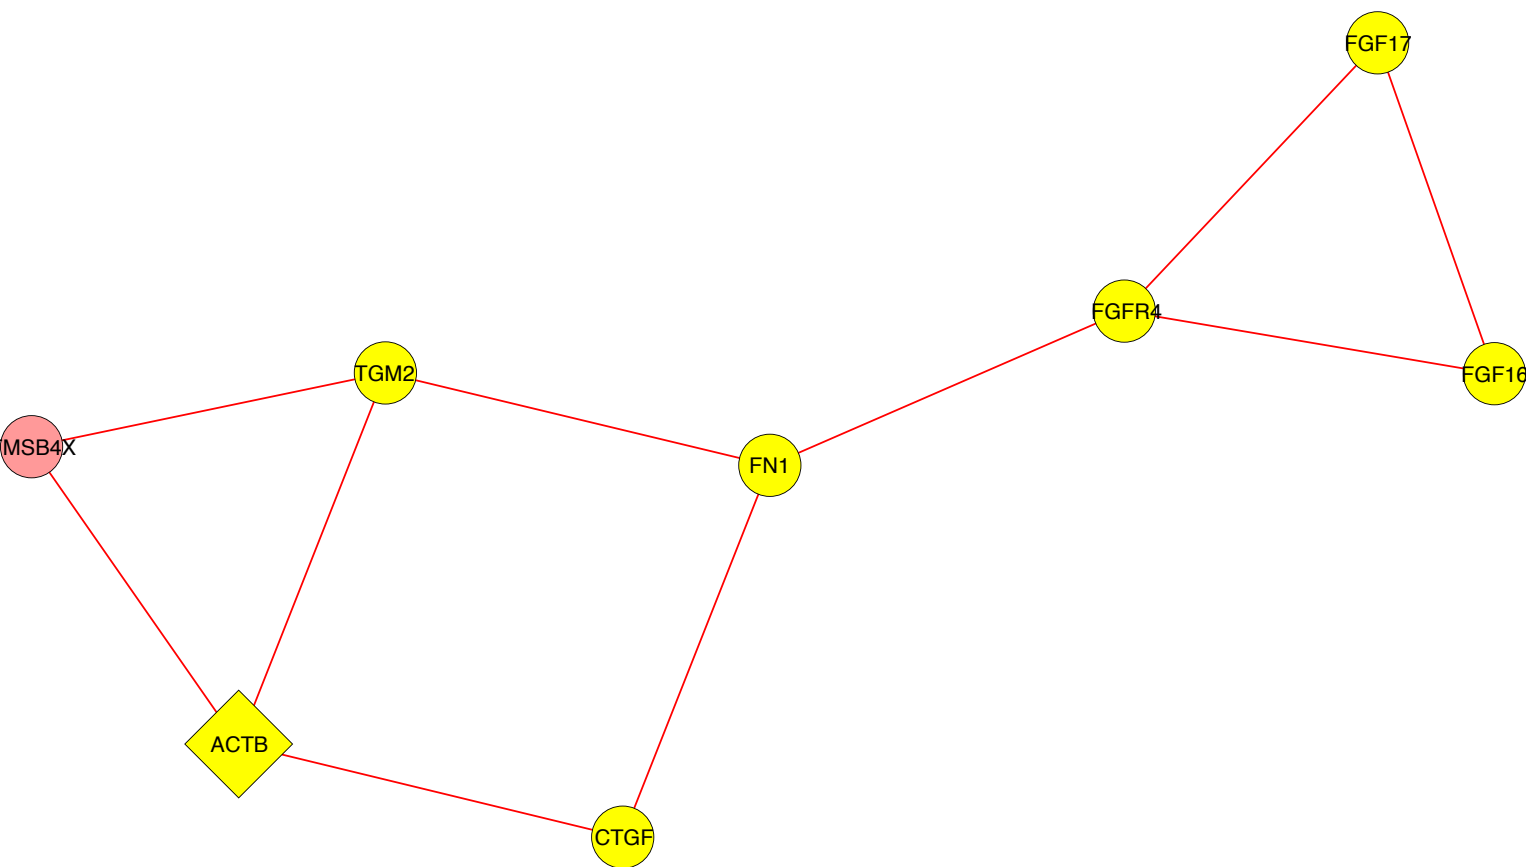

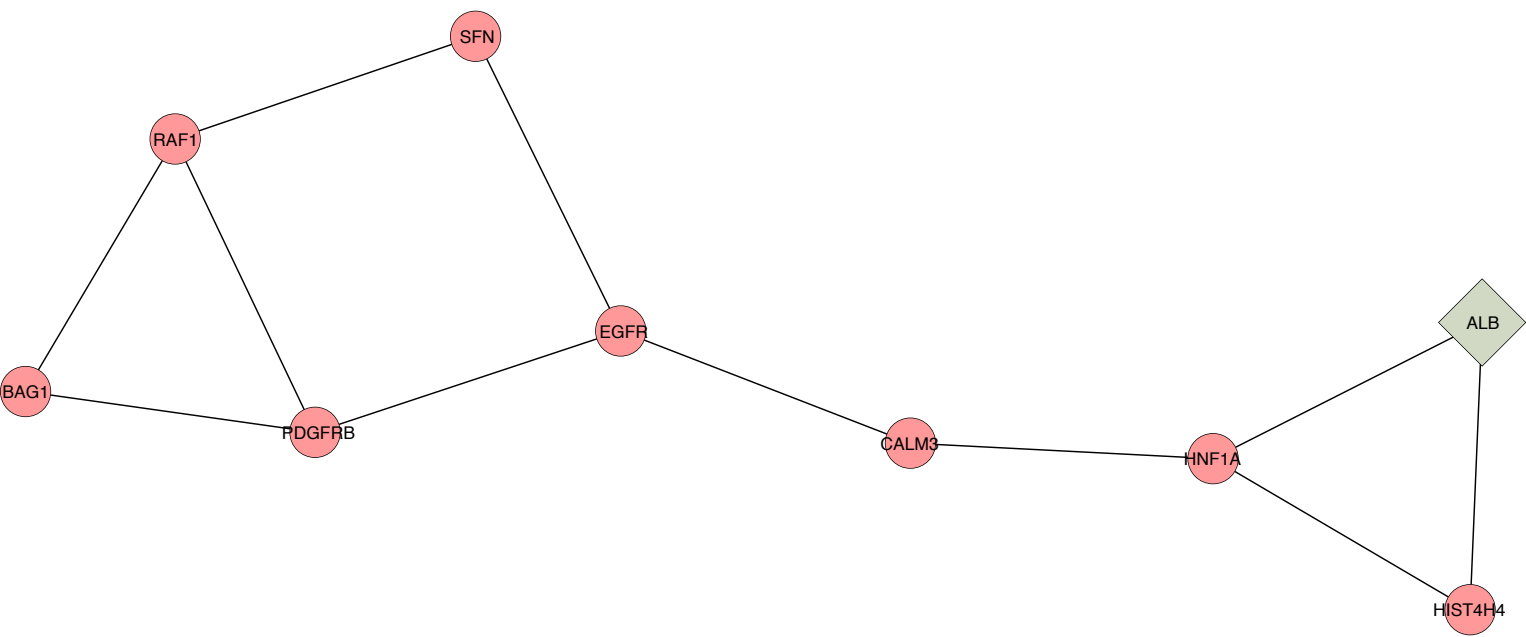

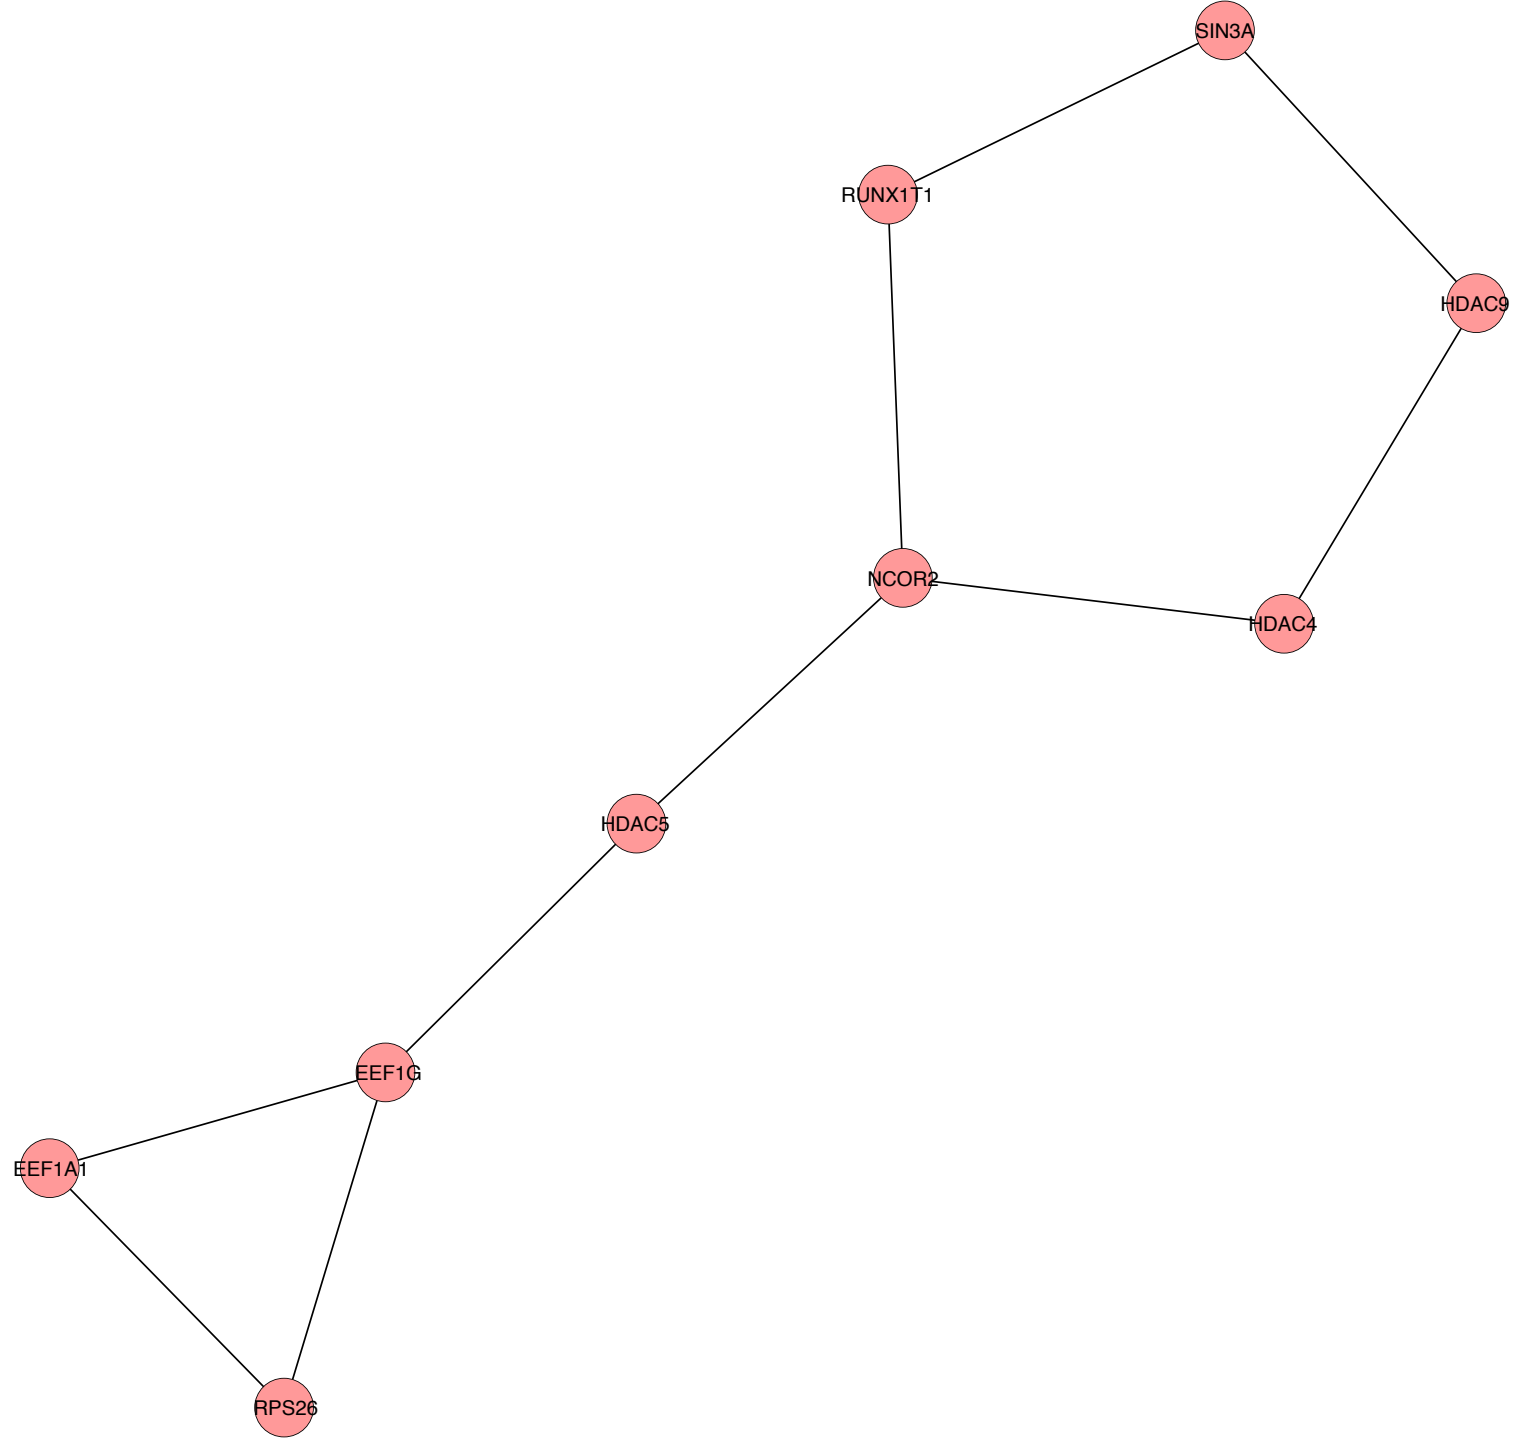

ARID1B

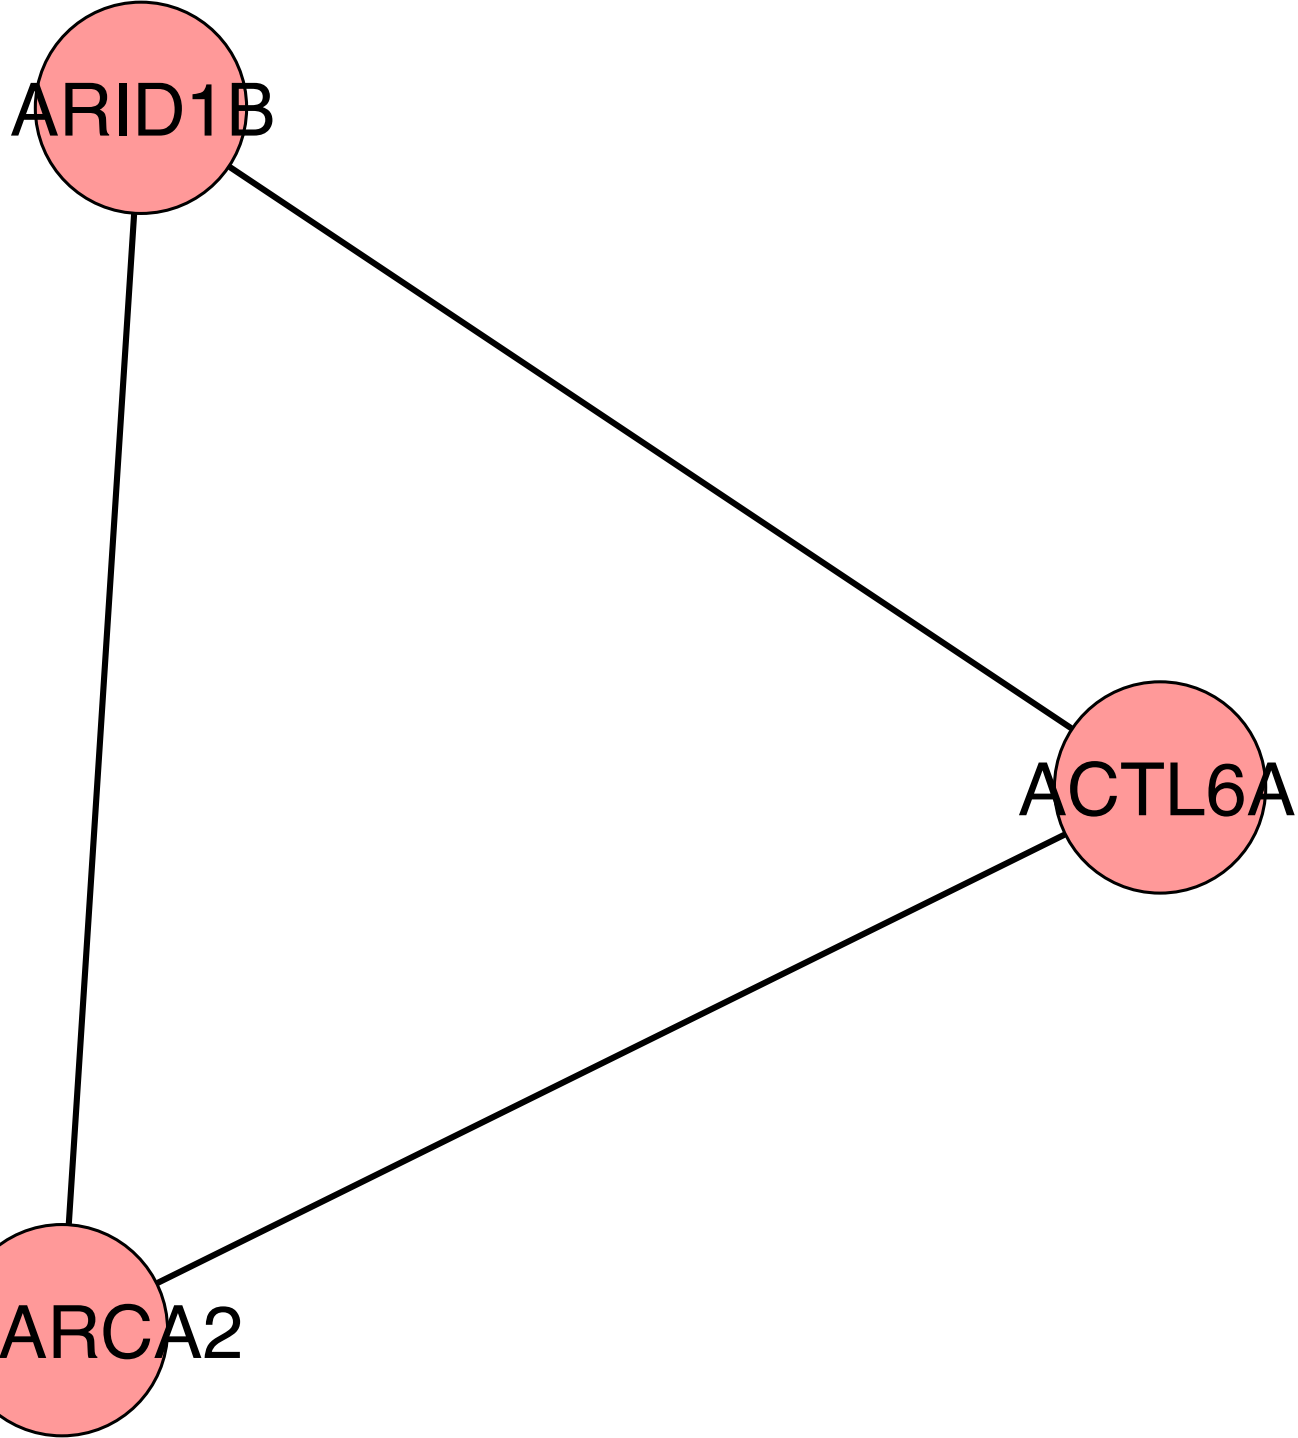

```
graph TD; ARID1B --- SMARCA2; ARID1B --- ACTL6A; SMARCA2 --- ACTL6A
```

SMARCA2

ACTL6A

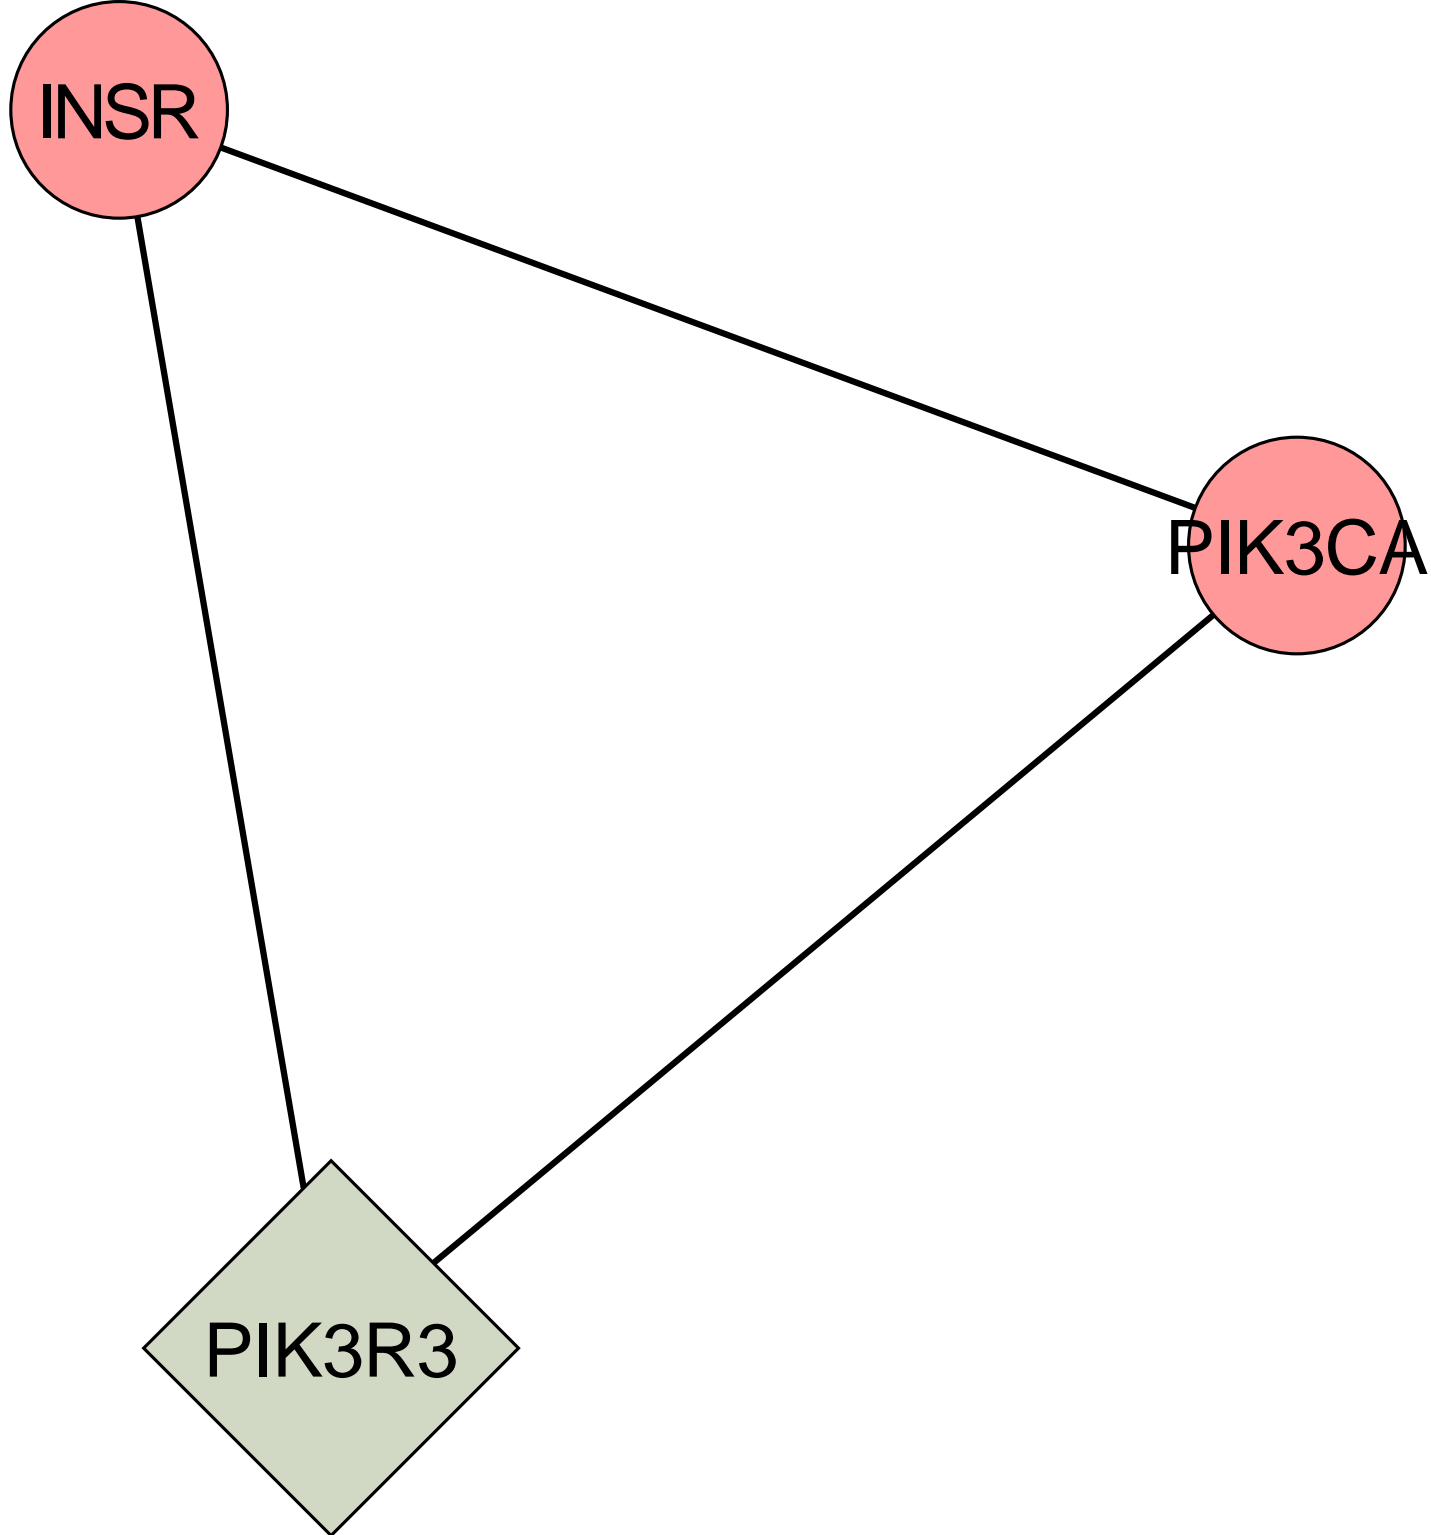

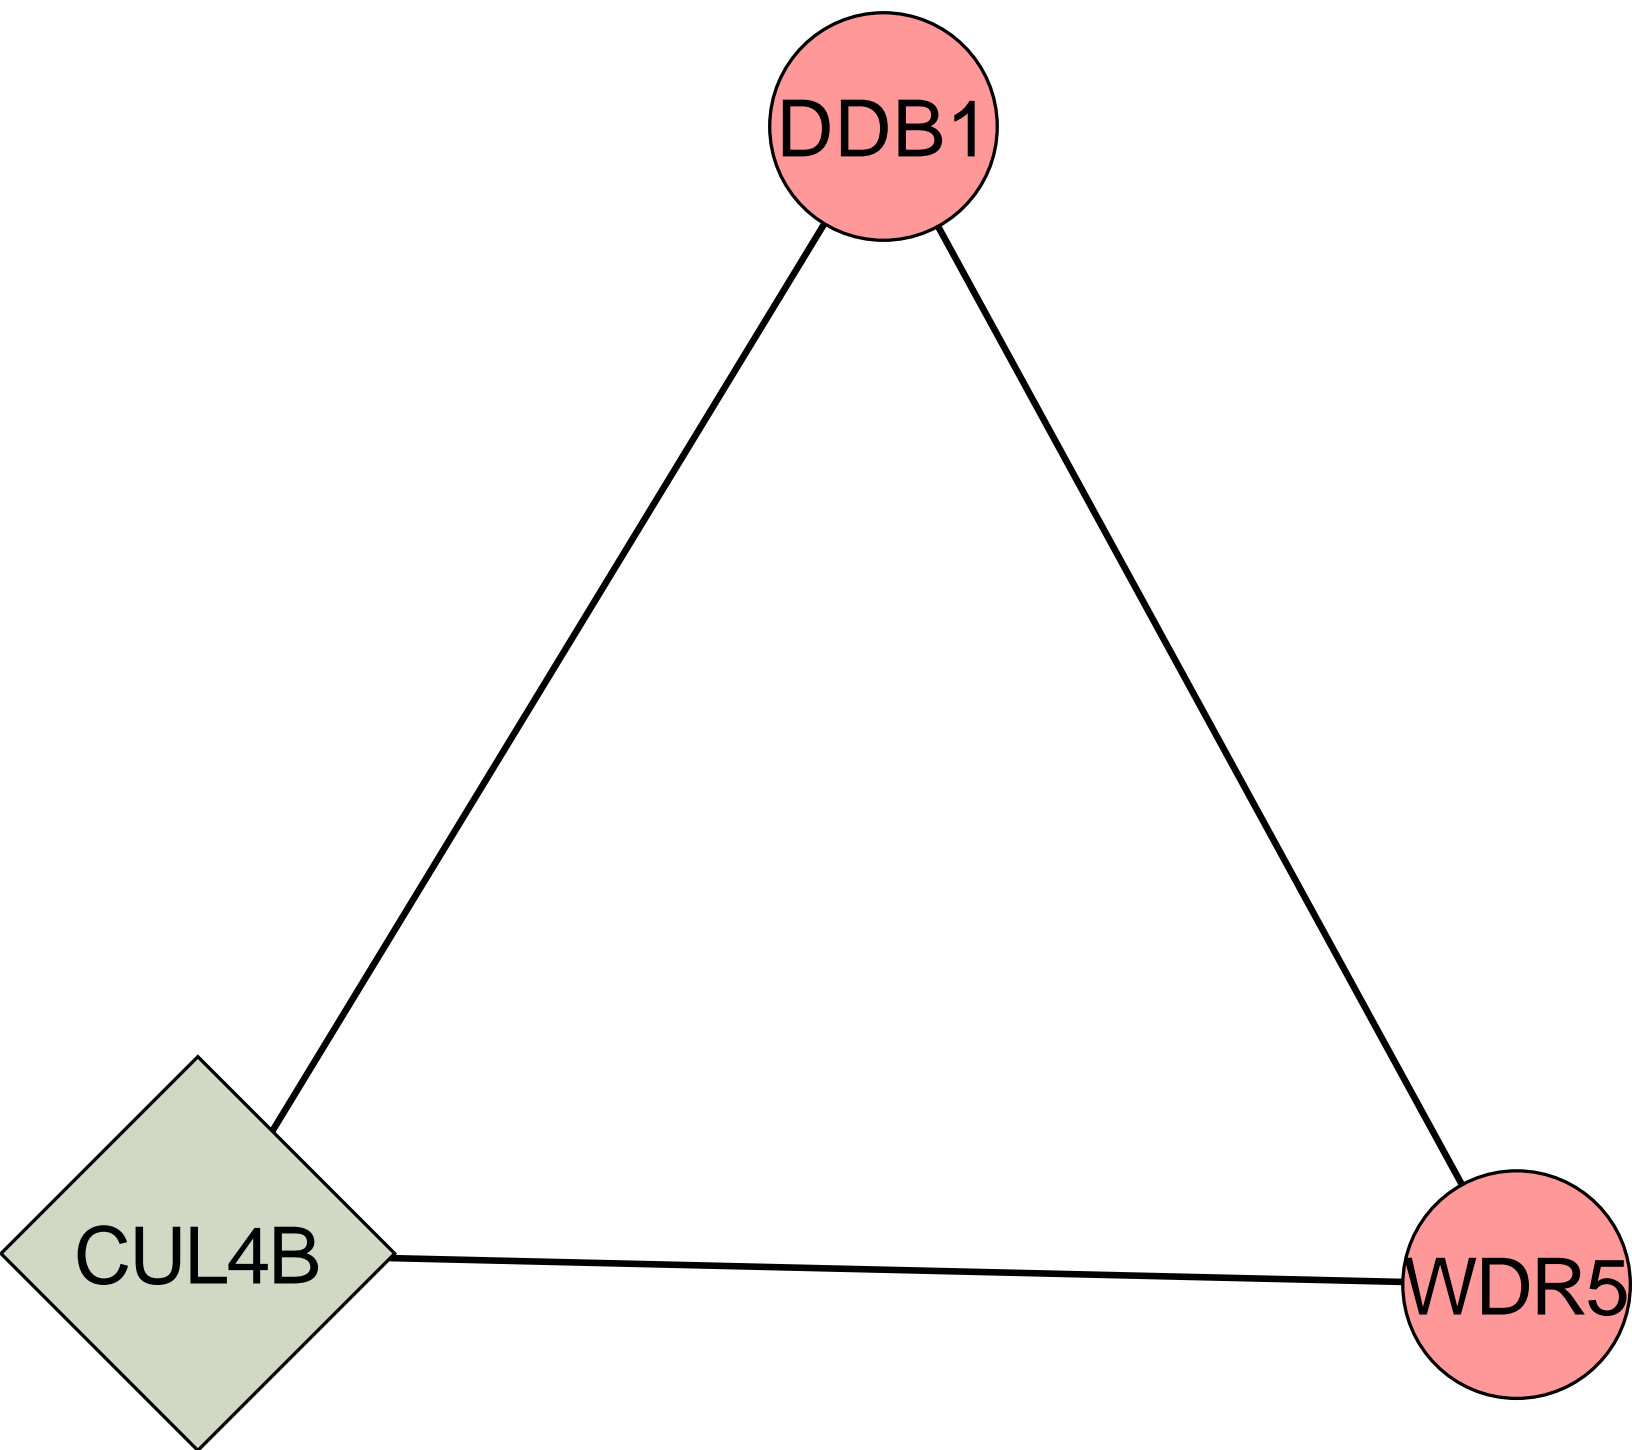

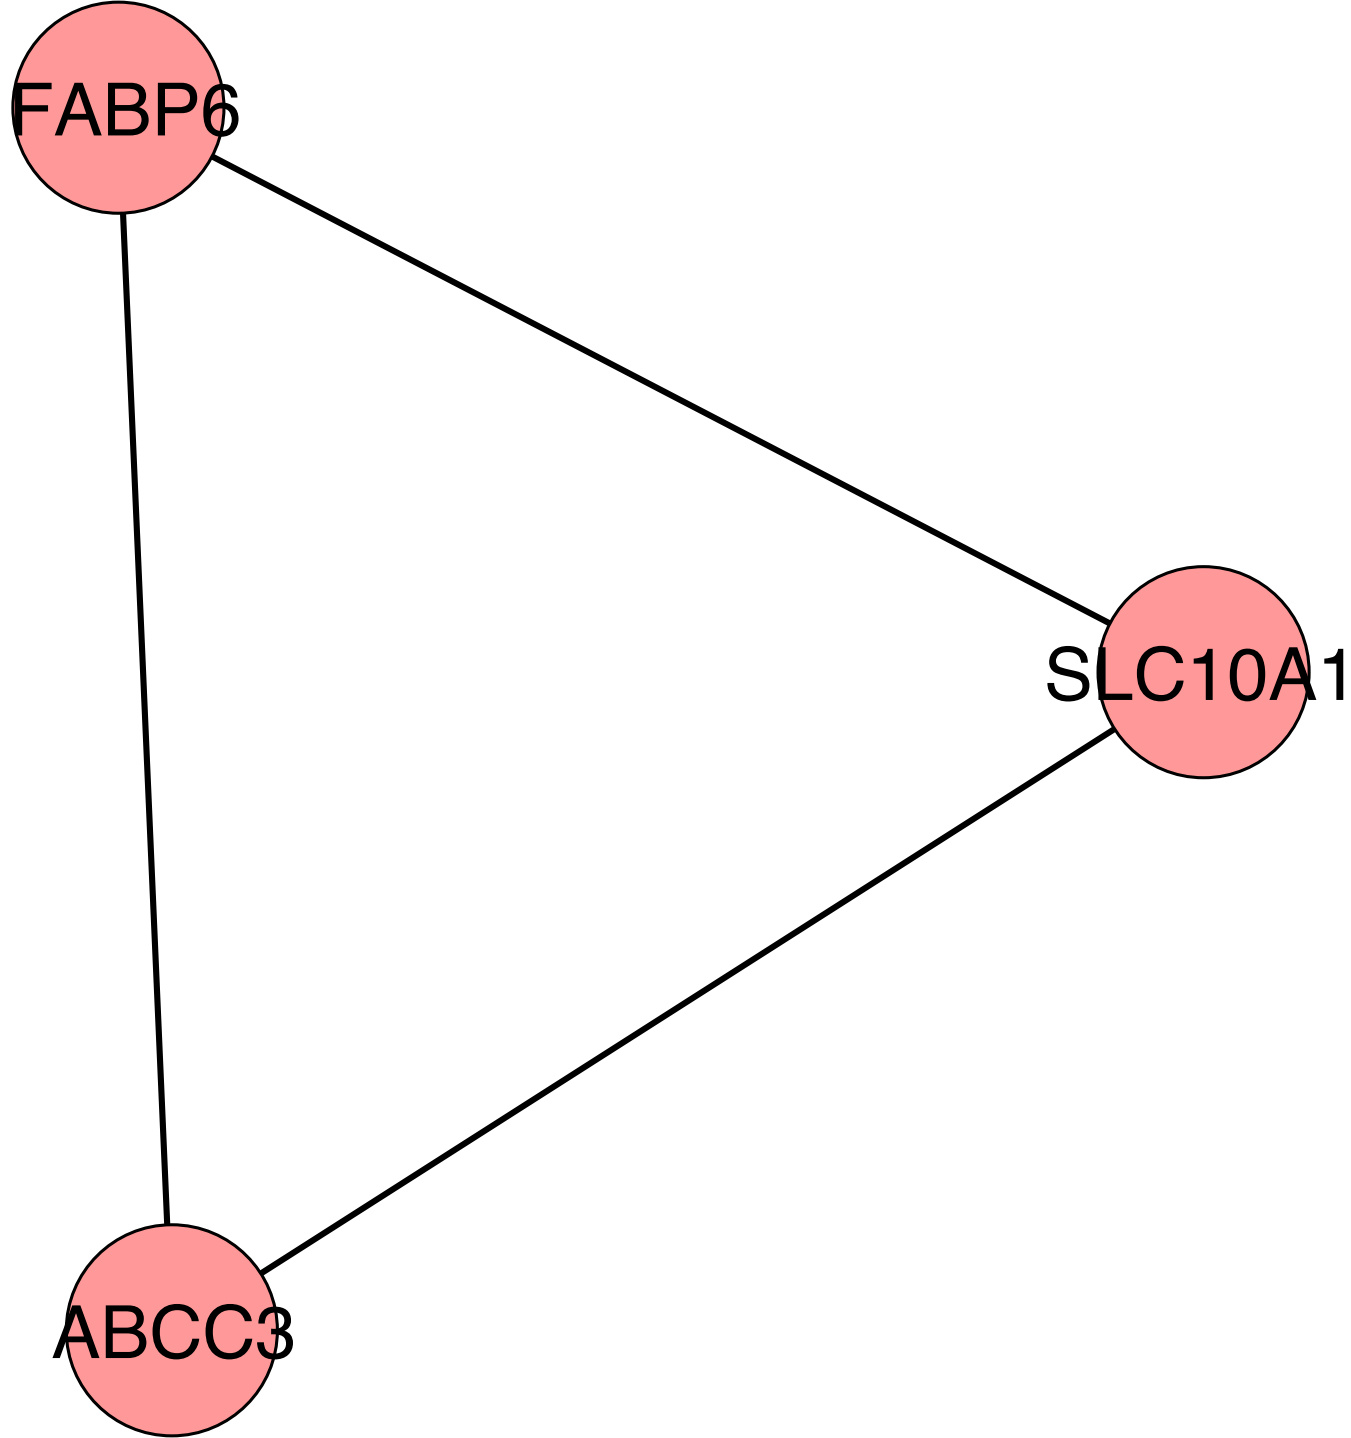

Supplement: Supplementary file 1 [file 1]
